# Supplementary material for: Dual activity of indolin-2-ones containing an arylidene motif: DNA and BSA interaction
Source: Royal Society of Chemistry journal article supplement (doi:10.1039/d3ra04997c), 2023-01-01
Supplement: d3ra04997c1.pdf [file d3ra04997c1.pdf]

## RSC ADVANCES

Supplementary Information associated with the paper

### Dual activity of indolin-2-ones containing an arylidene motif: DNA and BSA interaction

Syed Nasir Abbas Bukhari<sup>1\*</sup>, Tariq G. Alsahli<sup>2</sup>, Hasan Ejaz<sup>3</sup>, Naveed Ahmed<sup>4</sup>, Waqas Ahmad<sup>5</sup>, Mervat A. Elsherif<sup>6</sup>, Nasser H. Alotaibi<sup>7</sup>, Kashaf Junaid<sup>8</sup>, and Nenad Janković<sup>9\*</sup>

<sup>1</sup>Department of Pharmaceutical Chemistry, College of Pharmacy, Jouf University, Sakaka, Al Jouf, 72388, Saudi Arabia; sbukhari@ju.edu.sa (SNAB)

<sup>2</sup> Department of Pharmacology, College of Pharmacy, Jouf University, Sakaka, Al Jouf, 72388, Saudi Arabia; TGAAlsahli@ju.edu.sa (TGA)

<sup>3</sup> Department of Clinical Laboratory Sciences, College of Applied Medical Sciences, Sakaka, Jouf University, Al Jouf, 72388, Saudi Arabia; hetariq@ju.edu.sa (HE)

<sup>4</sup> Department of Pharmaceutics, College of Pharmacy, Jouf University, Sakaka, Al Jouf, 72388, Saudi Arabia; nakahmad@ju.edu.sa (NA)

<sup>5</sup> Discipline of Pharmaceutical Chemistry, School of Pharmaceutical Sciences, Universiti Sains Malaysia, Gelugor, 11800, Penang, Malaysia; waqas@usm.my (WA)

<sup>6</sup> Chemistry Department, College of Science, Jouf University, Al Jouf, 72388, Sakaka, Saudi Arabia; maelsherif@ju.edu.sa (MAE)

<sup>7</sup> Department of Clinical Pharmacy, College of Pharmacy, Jouf University, Sakaka 72388, Saudi Arabia; nhalotaibi@ju.edu.sa (NHA)

<sup>8</sup> School of Biological and Behavioural Sciences, Queen Mary University of London, London, E1 4NS, UK Email: kashaf.junaid@qmul.ac.uk (KJ)

<sup>9</sup> University of Kragujevac, Institute for Information of Technologies Kragujevac, Department of Science, Jovana Cvijića bb, 34000 Kragujevac; nenad.jankovic@kg.ac.rs (NJ)

\*Correspondence: sbukhari@ju.edu.sa (SNAB); nenad.jankovic@kg.ac.rs (NJ)

## Contents

|                                                                                                              |           |
|--------------------------------------------------------------------------------------------------------------|-----------|
| <b>1. Experimental data</b>                                                                                  | <b>3</b>  |
| <b>2. NMR spectra</b>                                                                                        | <b>5</b>  |
| 2.1. <sup>1</sup> H NMR spectrum of 1-allylindoline-2,3-dione <b>1</b>                                       | 6         |
| 2.2. <sup>13</sup> C NMR spectrum of 1-allylindoline-2,3-dione <b>1</b>                                      | 7         |
| 2.3. <sup>1</sup> H NMR spectrum of 1-allyl-3-(2-oxo-2-phenylethylidene)indolin-2-one <b>4a</b>              | 8         |
| 2.4. <sup>13</sup> C NMR spectrum of 1-allyl-3-(2-oxo-2-phenylethylidene)indolin-2-one <b>4a</b>             | 9         |
| 2.5. <sup>1</sup> H NMR spectrum of 1-allyl-3-(2-oxo-2-p-tolyloethylidene)indolin-2-one <b>4b</b>            | 10        |
| 2.6. <sup>13</sup> C NMR spectrum of 1-allyl-3-(2-oxo-2-p-tolyloethylidene)indolin-2-one <b>4b</b>           | 11        |
| 2.7. <sup>1</sup> H NMR spectrum of 1-allyl-3-(2-(4-bromophenyl)-2-oxoethylidene)indolin-2-one <b>4c</b>     | 12        |
| 2.8. <sup>13</sup> C NMR spectrum of 1-allyl-3-(2-(4-bromophenyl)-2-oxoethylidene)indolin-2-one <b>4c</b>    | 13        |
| 2.9. <sup>1</sup> H NMR spectrum of 1-allyl-3-(2-(3-aminophenyl)-2-oxoethylidene)indolin-2-one <b>4d</b>     | 14        |
| 2.10. <sup>13</sup> C NMR spectrum of 1-allyl-3-(2-(3-aminophenyl)-2-oxoethylidene)indolin-2-one <b>4d</b>   | 15        |
| 2.11. <sup>1</sup> H NMR spectrum of 1-allyl-3-(2-(3-nitrophenyl)-2-oxoethylidene)indolin-2-one <b>4e</b>    | 16        |
| 2.12. <sup>13</sup> C NMR spectrum 1-allyl-3-(2-(3-nitrophenyl)-2-oxoethylidene)indolin-2-one <b>4e</b>      | 17        |
| 2.13. <sup>1</sup> H NMR spectrum of 1-allyl-3-(2-(3-methoxyphenyl)-2-oxoethylidene)indolin-2-one <b>4f</b>  | 18        |
| 2.14. <sup>13</sup> C NMR spectrum of 1-allyl-3-(2-(3-methoxyphenyl)-2-oxoethylidene)indolin-2-one <b>4f</b> | 19        |
| 2.15. <sup>1</sup> H NMR spectrum of 1-allyl-3-(2-oxo-2-(pyridin-2-yl)ethylidene)indolin-2-one <b>4g</b>     | 20        |
| 2.16. <sup>13</sup> C NMR spectrum of 1-allyl-3-(2-oxo-2-(pyridin-2-yl)ethylidene)indolin-2-one <b>4g</b>    | 21        |
| 2.17. <sup>1</sup> H NMR spectrum of 1-allyl-3-(2-oxo-2-(thiophen-2-yl)ethylidene)indolin-2-one <b>4h</b>    | 22        |
| 2.18. <sup>13</sup> C NMR spectrum of 1-allyl-3-(2-oxo-2-(thiophen-2-yl)ethylidene)indolin-2-one <b>4h</b>   | 23        |
| <b>3. MS spectra of 4a-h</b>                                                                                 | <b>24</b> |
| <b>4. IR spectra of 4a-h</b>                                                                                 | <b>29</b> |

## 1. Experimental data

### 1-allylindoline-2,3-dione 1

Red solid; Yield: 96%; Mp = 95 °C; <sup>1</sup>H NMR (200 MHz, DMSO-d<sub>6</sub>) δ 7.68-7.53 (m, 2H, CH<sub>Ar</sub>), 7.16-7.03 (m, 2H, CH<sub>Ar</sub>), 5.96 – 5.77 (m, 1H, =CH), 5.39-5.16 (m, 2H, =CH<sub>2</sub>), 4.31 (dt, *J* = 4.9, 1.7 Hz, 2H, N-CH<sub>2</sub>) ppm; <sup>13</sup>C NMR (50 MHz, DMSO-d<sub>6</sub>) δ 183.2, 157.9, 150.5, 138.1, 131.4, 124.5, 123.3, 117.5, 111.2, 41.9 ppm.

### 1-allyl-3-(2-oxo-2-phenylethylidene)indolin-2-one 4a

Orange solid; Yield: 54 % (1,06 g); Mp = 85 °C; IR ν 3434, 1706, 1658, 1619, 1600, 1464, 1346, 1225 cm<sup>-1</sup>; <sup>1</sup>H NMR (200 MHz, DMSO-d<sub>6</sub>) δ 8.11-8.03 (m, 3H, CH<sub>Ar</sub>), 7.81 (s, 1H, =CH), 7.77-7.68 (m, 1H, CH<sub>Ar</sub>), 7.63-7.55 (m, 2H, CH<sub>Ar</sub>), 7.44-7.35 (m, 1H, CH<sub>Ar</sub>), 7.04-6.97 (m, 2H, CH<sub>Ar</sub>), 5.97-5.78 (m, 1H, =CH<sub>allyl</sub>), 5.24-5.14 (m, 2H, =CH<sub>2</sub>), 4.39-4.37 (m, 2H, N-CH<sub>2</sub>) ppm; <sup>13</sup>C NMR (50 MHz, DMSO-d<sub>6</sub>) δ 191.3, 166.5, 144.9, 136.9, 135.0, 134.2, 132.7, 131.8, 129.2, 128.7 (2C), 127.1 (2C), 126.4, 122.4, 119.4, 117.1, 109.8, 41.9 ppm; ESI-MS (*m/z*): [M+H]<sup>+</sup> = 290; Calcd. for C<sub>19</sub>H<sub>15</sub>NO<sub>2</sub>: C 78.87; H 5.23; N 4.84; Found: C 78.64; H 5.12; N 4.69.

### 1-allyl-3-(2-oxo-2-*p*-tolylethylidene)indolin-2-one 4b

Orange solid; Yield: 49 % (1,13 g); Mp = 90-92 °C; IR ν 3434, 1714, 1657, 1615, 1605, 1465, 1360, 1348 cm<sup>-1</sup>; <sup>1</sup>H NMR (200 MHz, DMSO-d<sub>6</sub>) δ 8.01-7.95 (m, 3H, CH<sub>Ar</sub>), 7.79 (s, 1H, =CH), 7.41-7.32 (m, 3H, CH<sub>Ar</sub>), 7.03-6.96 (m, 2H, CH<sub>Ar</sub>), 6.01-5.78 (s, 1H, =CH<sub>allyl</sub>), 5.23-5.14 (m, 2H, CH<sub>2</sub>), 4.37 (d, *J* = 5.0 Hz, 2H, N-CH<sub>2</sub>), 2.39 (s, 3H, CH<sub>3</sub>) ppm; <sup>13</sup>C NMR (50 MHz, DMSO-d<sub>6</sub>) δ 190.8, 166.6, 144.9, 144.8, 134.7, 134.5, 132.6, 131.8, 129.8 (2C), 128.8 (2C), 127.4, 126.3, 122.3, 119.4, 117.1, 109.7, 41.9, 21.5 ppm; ESI-MS (*m/z*): [M+H]<sup>+</sup> = 304; Calcd. for C<sub>20</sub>H<sub>17</sub>NO<sub>2</sub>: C 79.19; H 5.65; N 4.62; Found: C 79.02; H 5.48; N 4.50.

### 1-allyl-3-(2-(4-bromophenyl)-2-oxoethylidene)indolin-2-one 4c

Red solid; Yield: 80 % (2,21 g); Mp = 98 °C; IR ν 3432, 1716, 1665, 1616, 1596, 1466 cm<sup>-1</sup>; <sup>1</sup>H NMR (200 MHz, DMSO-d<sub>6</sub>) δ 8.07-7.97 (m, 3H, CH<sub>Ar</sub>), 7.97-7.70 (m, 3H, =CH + CH<sub>Ar</sub>), 7.45-7.35 (m, 1H, CH<sub>Ar</sub>), 7.06-6.98 (m, 2H, CH<sub>Ar</sub>), 6.02-5.78 (s, 1H, =CH<sub>allyl</sub>), 5.23-5.14 (m, 2H, CH<sub>2</sub>), 4.37 (d, *J* = 5.0 Hz, 2H, N-CH<sub>2</sub>) ppm; <sup>13</sup>C NMR (50 MHz, DMSO-d<sub>6</sub>) δ 190.3, 166.5, 145.1, 136.0, 135.5, 132.9 (2C), 132.2 (2C), 131.8, 130.6, 128.4, 126.6, 126.4, 122.4, 119.4, 117.2, 109.8, 41.9 ppm; ESI-MS (*m/z*): [M]<sup>+</sup> = 368; Calcd. for C<sub>19</sub>H<sub>14</sub>BrNO<sub>2</sub>: C 61.97; H 3.83; N 3.80; Found: C 61.70; H 3.64; N 3.72.

### 1-allyl-3-(2-(3-aminophenyl)-2-oxoethylidene)indolin-2-one 4d

Dark red crystals; Yield: 43 % (1,15 g); Mp = 168 °C; IR ν 3435, 2803, 2752, 2572, 1710, 1657, 1614, 1599, 1466, 1256 cm<sup>-1</sup>; <sup>1</sup>H NMR (200 MHz, DMSO-d<sub>6</sub>) δ 8.07 (d, *J* = 7.4 Hz, 1H, CH<sub>Ar</sub>), 8.02-7.96 (m, 2H, CH<sub>Ar</sub>), 7.77 (s, 1H, =CH), 7.66-7.60 (m, 2H, CH<sub>Ar</sub>), 7.45-7.37 (m, 1H, CH<sub>Ar</sub>), 7.06-6.98 (m, 2H, CH<sub>Ar</sub>), 5.96-5.78 (m, 1H, =CH<sub>allyl</sub>), 5.22-5.13 (m, 2H, =CH<sub>2</sub>), 4.38 (d, *J* = 5.0 Hz, 2H, N-CH<sub>2</sub>) ppm; <sup>13</sup>C NMR (50 MHz, DMSO-d<sub>6</sub>) δ 190.4, 166.6, 145.1, 138.1, 136.0, 135.6, 133.0, 131.8, 130.6, 127.2, 126.6, 126.5, 126.2, 122.5, 121.4, 119.4, 117.2, 109.9, 41.9 ppm; ESI-MS (*m/z*): [M+H]<sup>+</sup> = 305; Calcd. for C<sub>19</sub>H<sub>16</sub>N<sub>2</sub>O<sub>2</sub>: C 74.98; H 5.30; N 9.20; Found: C 74.82; H 5.15; N 9.28.

### 1-allyl-3-(2-(3-nitrophenyl)-2-oxoethylidene)indolin-2-one 4e

Brown solid; Yield: 81 % (2,10 g); Mp = 130 °C; IR ν 3428, 1711, 1657, 1609, 1530, 1467, 1346 cm<sup>-1</sup>; <sup>1</sup>H NMR (200 MHz, DMSO-d<sub>6</sub>) δ 8.73-8.71 (m, 1H, CH<sub>Ar</sub>), 8.51-8.48 (m, 2H, CH<sub>Ar</sub>), 8.16 (d, *J* = 7.4 Hz, 1H, CH<sub>Ar</sub>), 7.92-7.82 (m, 2H, =CH + CH<sub>Ar</sub>), 7.48-7.39 (m, 1H, CH<sub>Ar</sub>), 7.08-6.99 (m, 2H, CH<sub>Ar</sub>), 6.04-5.79 (m, 1H, =CH<sub>allyl</sub>), 5.24-5.15 (m, 2H, =CH<sub>2</sub>), 4.40-4.38 (m, 2H, N-CH<sub>2</sub>) ppm; <sup>13</sup>C NMR (50 MHz, DMSO-d<sub>6</sub>) δ 189.2, 166.5, 148.2, 145.4, 138.2, 136.5, 134.8, 133.4, 131.7, 131.0, 128.1,

127.0, 125.4, 122.9, 122.5, 119.3, 117.2, 109.8, 41.9 ppm; ESI-MS ( $m/z$ ):  $[M+H]^+ = 335$ ; Calcd. for  $C_{19}H_{14}N_2O_4$ : C 68.26; H 4.22; N 8.38; Found: C 68.10; H 4.20; N 8.25.

#### **1-allyl-3-(2-(3-methoxyphenyl)-2-oxoethylidene)indolin-2-one 4f**

Orange amorphous solid; Yield: 64 % (1,31 g); Mp = 80 °C; IR  $\nu$  3434, 1715, 1657, 1620, 1591, 1462, 1354, 1262  $cm^{-1}$ ;  $^1H$  NMR (200 MHz, DMSO- $d_6$ )  $\delta$  8.03 (d,  $J = 7.3$  Hz, 1H,  $CH_{Ar}$ ), 7.78 (s, 1H, =CH), 7.69-7.63 (m, 1H,  $CH_{Ar}$ ), 7.54-7.26 (m, 4H,  $CH_{Ar}$ ), 7.05-6.97 (m, 2H,  $CH_{Ar}$ ), 6.02-5.76 (m, 1H, = $CH_{allyl}$ ), 5.23-5.14 (m, 2H, = $CH_2$ ), 4.37 (d,  $J = 5.0$  Hz, 2H, N- $CH_2$ ), 3.84 (s, 3H,  $OCH_3$ ) ppm;  $^{13}C$  NMR (50 MHz, DMSO- $d_6$ )  $\delta$  191.0, 166.6, 159.7, 145.0, 138.3, 135.1, 132.8, 131.8, 130.4, 127.1, 126.4, 122.4, 121.5, 120.4, 119.4, 117.2, 112.6, 109.8, 55.6, 41.9 ppm; ESI-MS ( $m/z$ ):  $[M+H]^+ = 320$ ; Calcd. for  $C_{20}H_{17}NO_3$ : C 75.22; H 5.37; N 4.39; Found: C 75.12; H 5.26; N 4.45.

#### **1-allyl-3-(2-oxo-2-(pyridin-2-yl)ethylidene)indolin-2-one 4g**

Dark red crystals; Yield: 27 % (0,60 g); Mp = 118-120 °C; IR  $\nu$  3434, 1704, 1668, 1619, 1597, 1466, 1363, 1226  $cm^{-1}$ ;  $^1H$  NMR (200 MHz, DMSO- $d_6$ )  $\delta$  8.82-8.87 (m, 1H,  $CH_{Ar}$ ), 8.55-8.51 (m, 1H,  $CH_{Ar}$ ), 8.45 (s, 1H, =CH), 8.14-8.07 (m, 2H,  $CH_{Ar}$ ), 7.74-7.72 (m, 1H,  $CH_{Ar}$ ), 7.43-7.39 (m, 1H,  $CH_{Ar}$ ), 7.06-6.96 (m, 2H,  $CH_{Ar}$ ), 5.96-5.77 (m, 1H, = $CH_{allyl}$ ), 5.22-5.13 (m, 2H, = $CH_2$ ), 4.38-4.35 (m, 2H, N- $CH_2$ ) ppm;  $^{13}C$  NMR (50 MHz, DMSO- $d_6$ )  $\delta$  190.0, 166.9, 153.4, 149.3, 145.5, 138.0, 136.5, 133.4, 131.8, 128.2, 127.6, 124.9, 122.6, 122.5, 119.7, 117.1, 109.7, 41.9 ppm; ESI-MS ( $m/z$ ):  $[M+H]^+ = 291$ ; Calcd. for  $C_{18}H_{14}N_2O_2$ : C 74.47; H 4.86; N 9.65; Found: C 74.28; H 4.71; N 9.70.

#### **1-allyl-3-(2-oxo-2-(thiophen-2-yl)ethylidene)indolin-2-one 4h**

Red solid; Yield: 27 % (0,64 g); Mp = 119-121 °C; IR  $\nu$  3428, 1709, 1643, 1613, 1464, 1413, 1352  $cm^{-1}$ ;  $^1H$  NMR (200 MHz, DMSO- $d_6$ )  $\delta$  8.33 (d,  $J = 7.8$  Hz, 1H,  $CH_{Ar}$ ), 8.18-8.13 (m, 2H,  $CH_{Ar}$ ), 7.74 (s, 1H, =CH), 7.43 (td,  $J = 7.8, 1.3$  Hz, 1H,  $CH_{Ar}$ ), 7.32 (dd,  $J = 4.9, 3.9$  Hz, 1H,  $CH_{Ar}$ ), 7.09-6.98 (m, 2H,  $CH_{Ar}$ ), 5.97-5.78 (m, 1H, = $CH_{allyl}$ ), 5.23-5.13 (m, 2H, = $CH_2$ ), 4.40-4.36 (m, 2H, N- $CH_2$ ) ppm;  $^{13}C$  NMR (50 MHz, DMSO- $d_6$ )  $\delta$  182.6, 166.6, 145.2, 144.9, 137.0, 135.8, 134.7, 133.1, 131.8, 129.4, 127.4, 125.5, 122.4, 119.5, 117.1, 109.7, 41.9 ppm; ESI-MS ( $m/z$ ):  $[M+H]^+ = 296$ ; Calcd. for  $C_{17}H_{14}NO_2S$ : C 68.90; H 4.65; N 4.73; Found: C 68.82; H 4.57; N 4.63.

## 2. NMR spectra

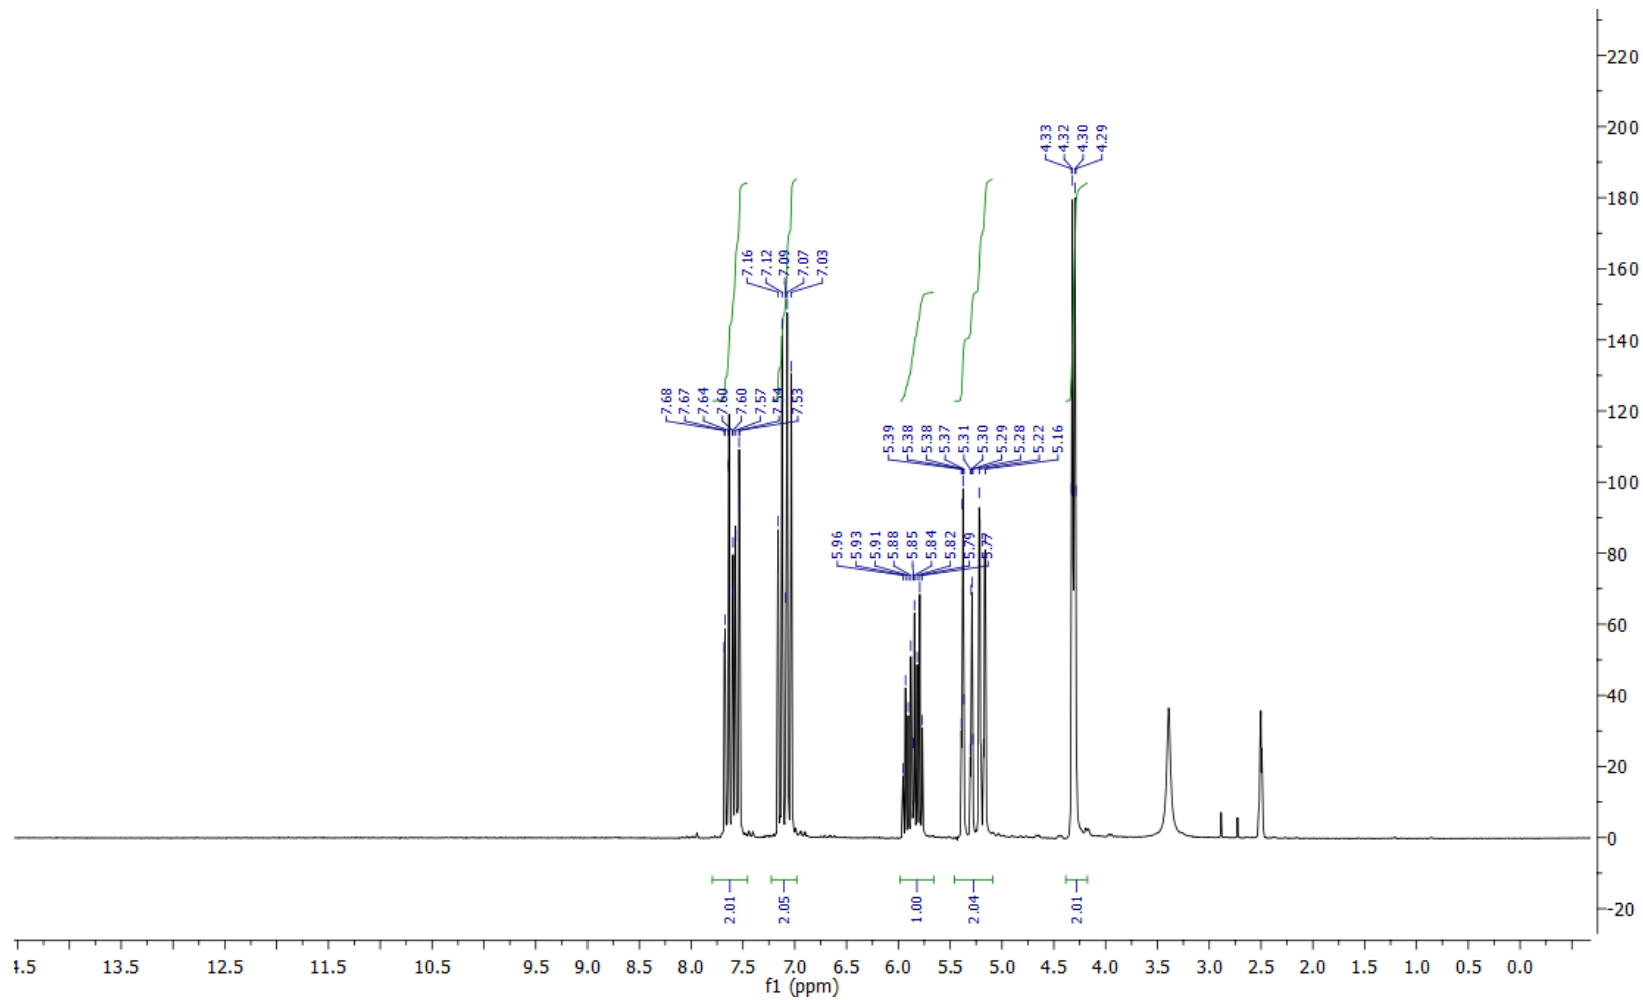

Figure S1.  $^1\text{H}$  NMR spectrum of **1**

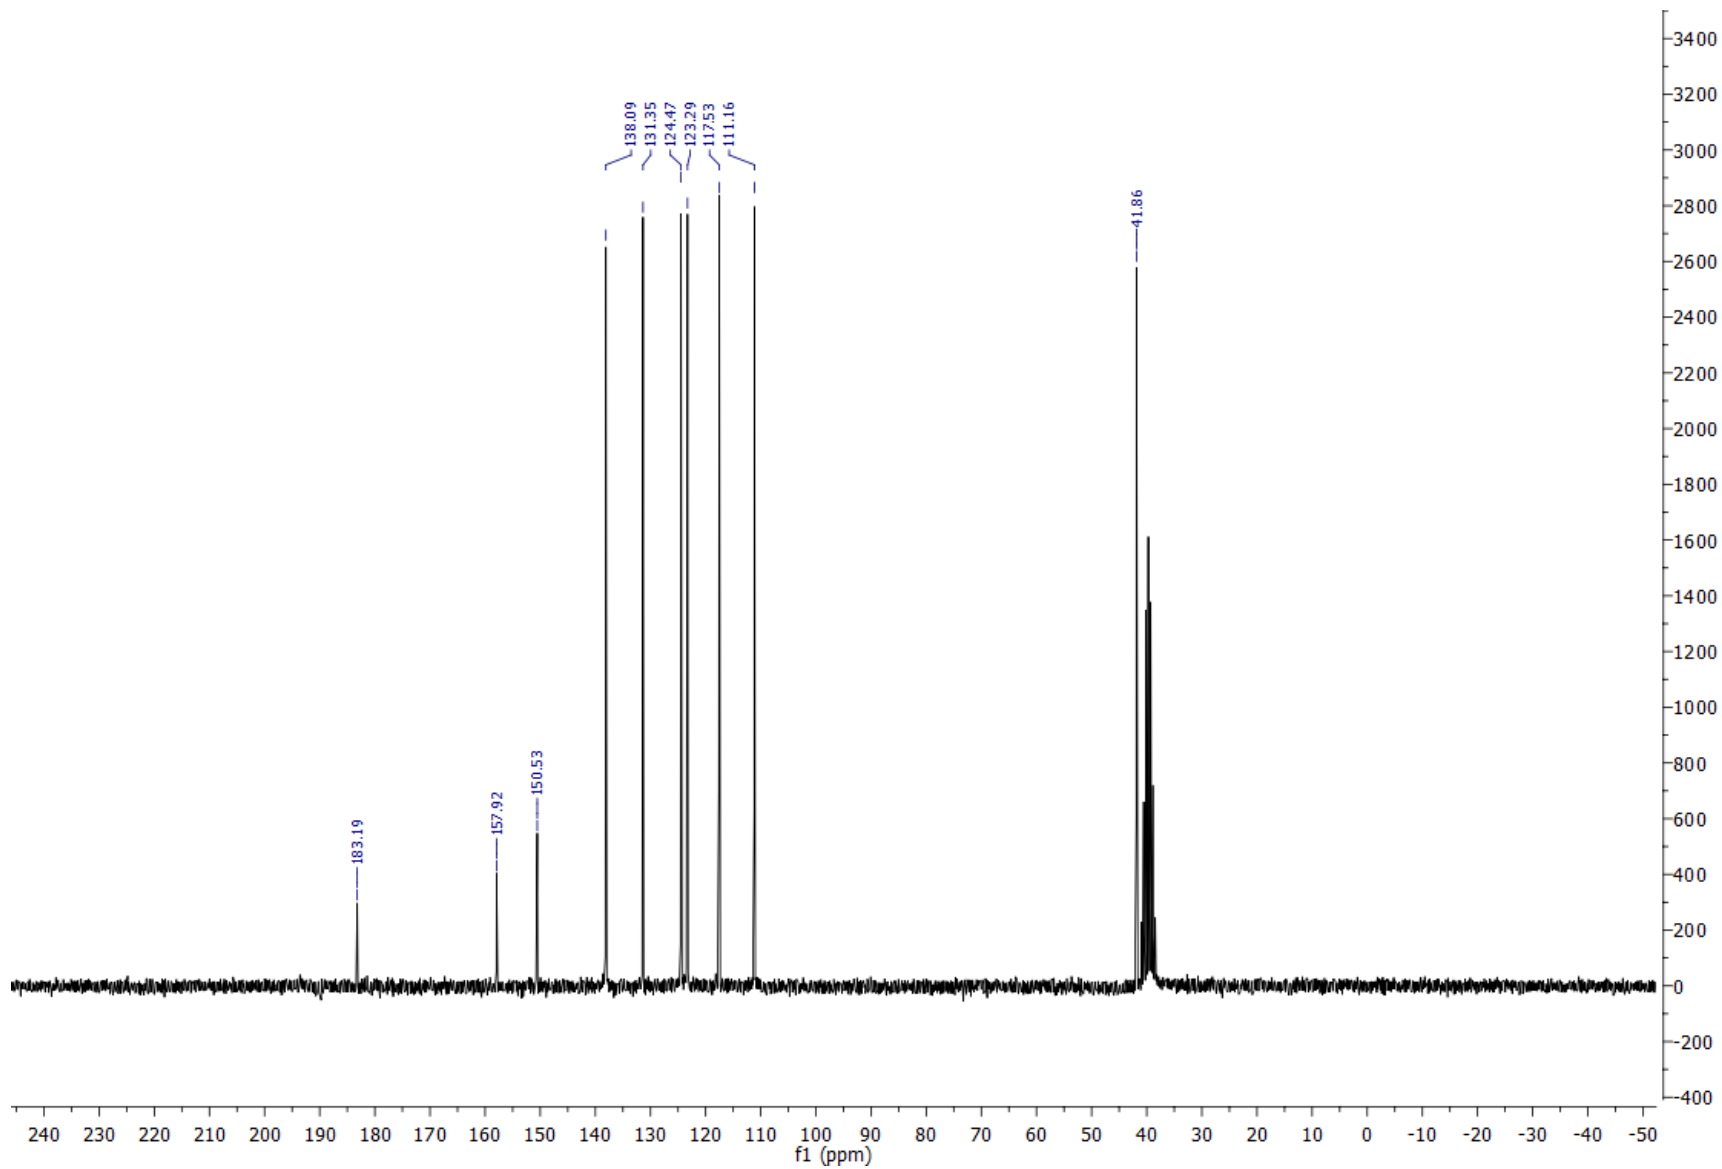

Figure S2.  $^{13}\text{C}$  NMR spectrum of 1

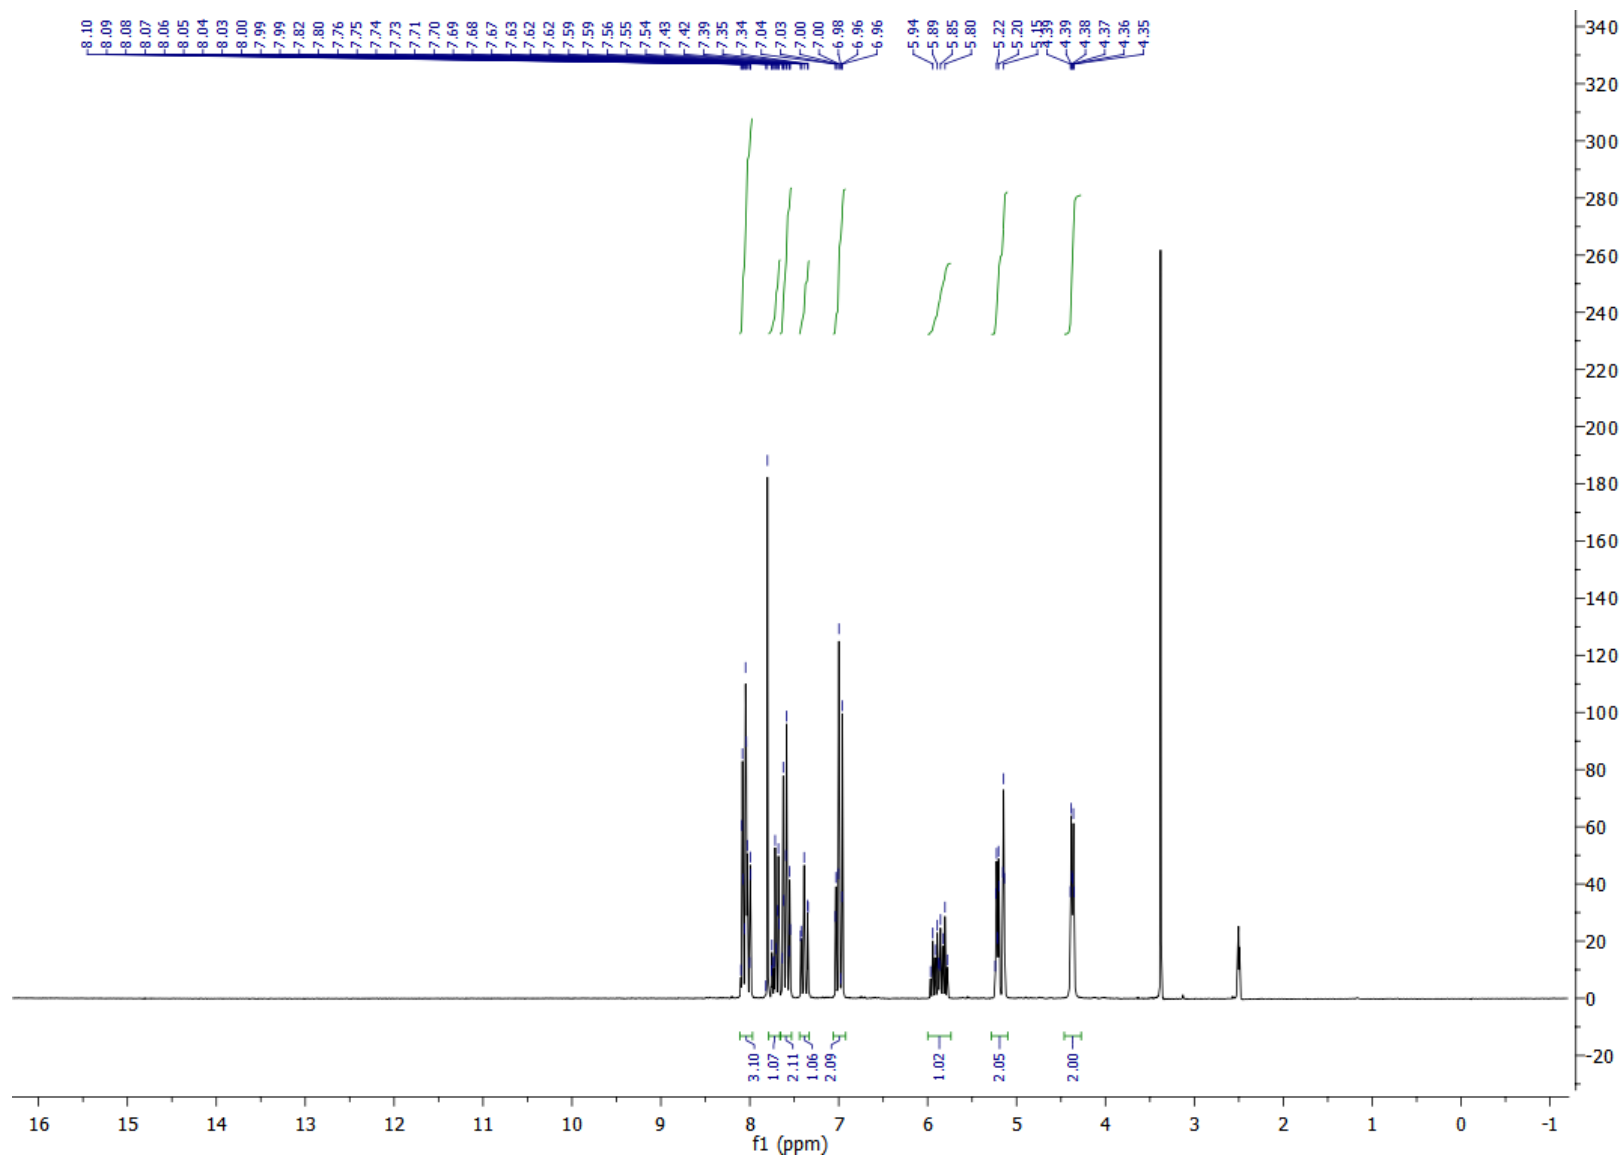

Figure S3. <sup>1</sup>H NMR spectrum of 4a

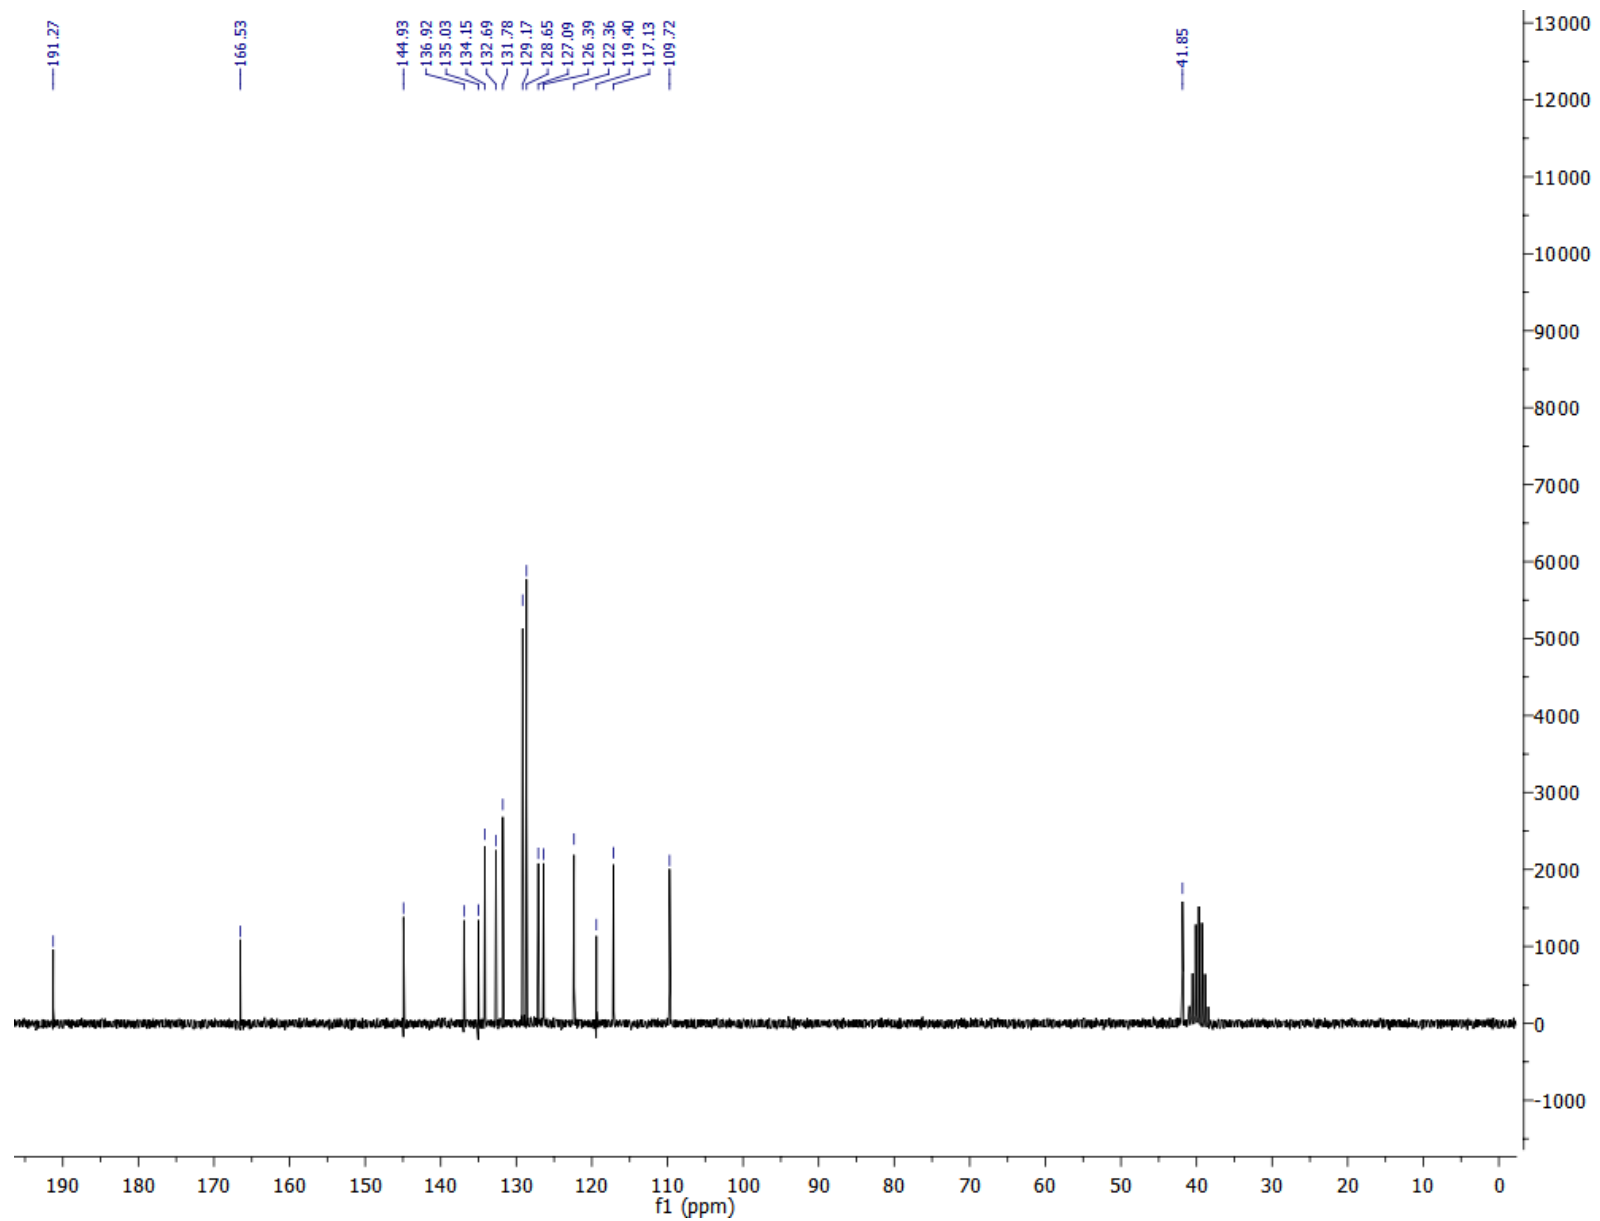

Figure S4.  $^{13}\text{C}$  NMR spectrum of 4a



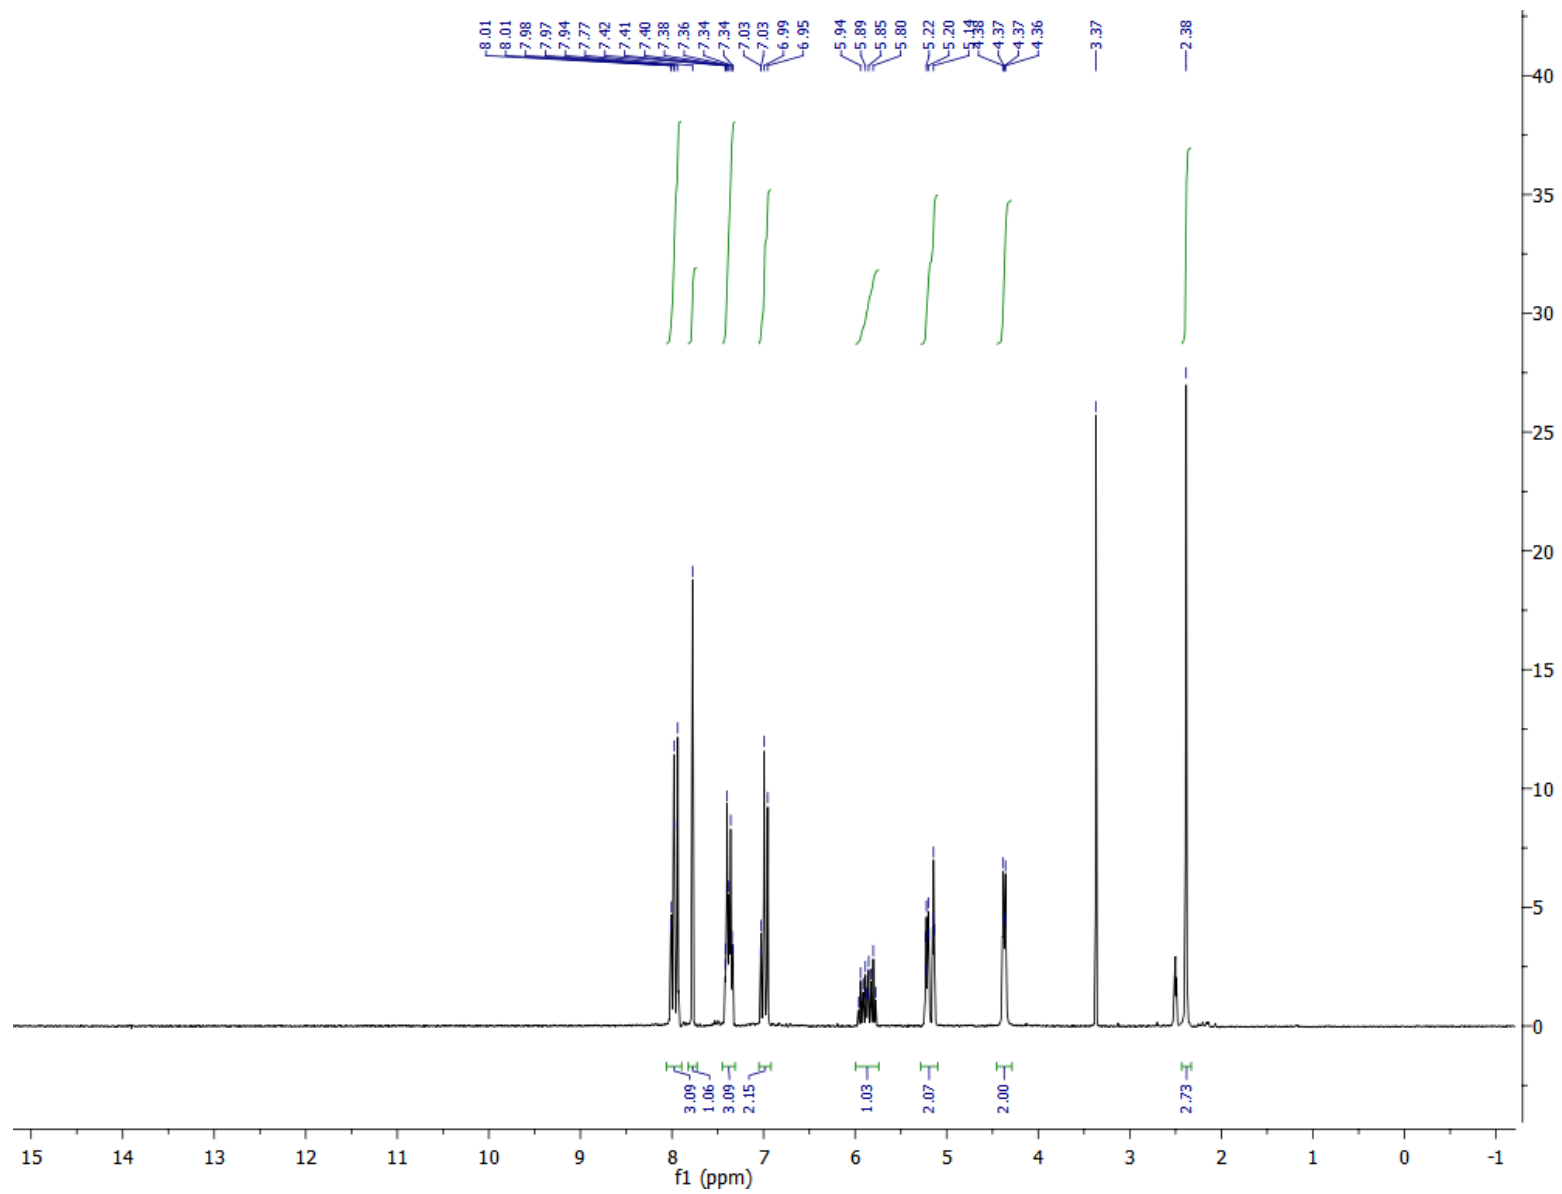

Figure S5.  $^1\text{H}$  NMR spectrum of **4b**

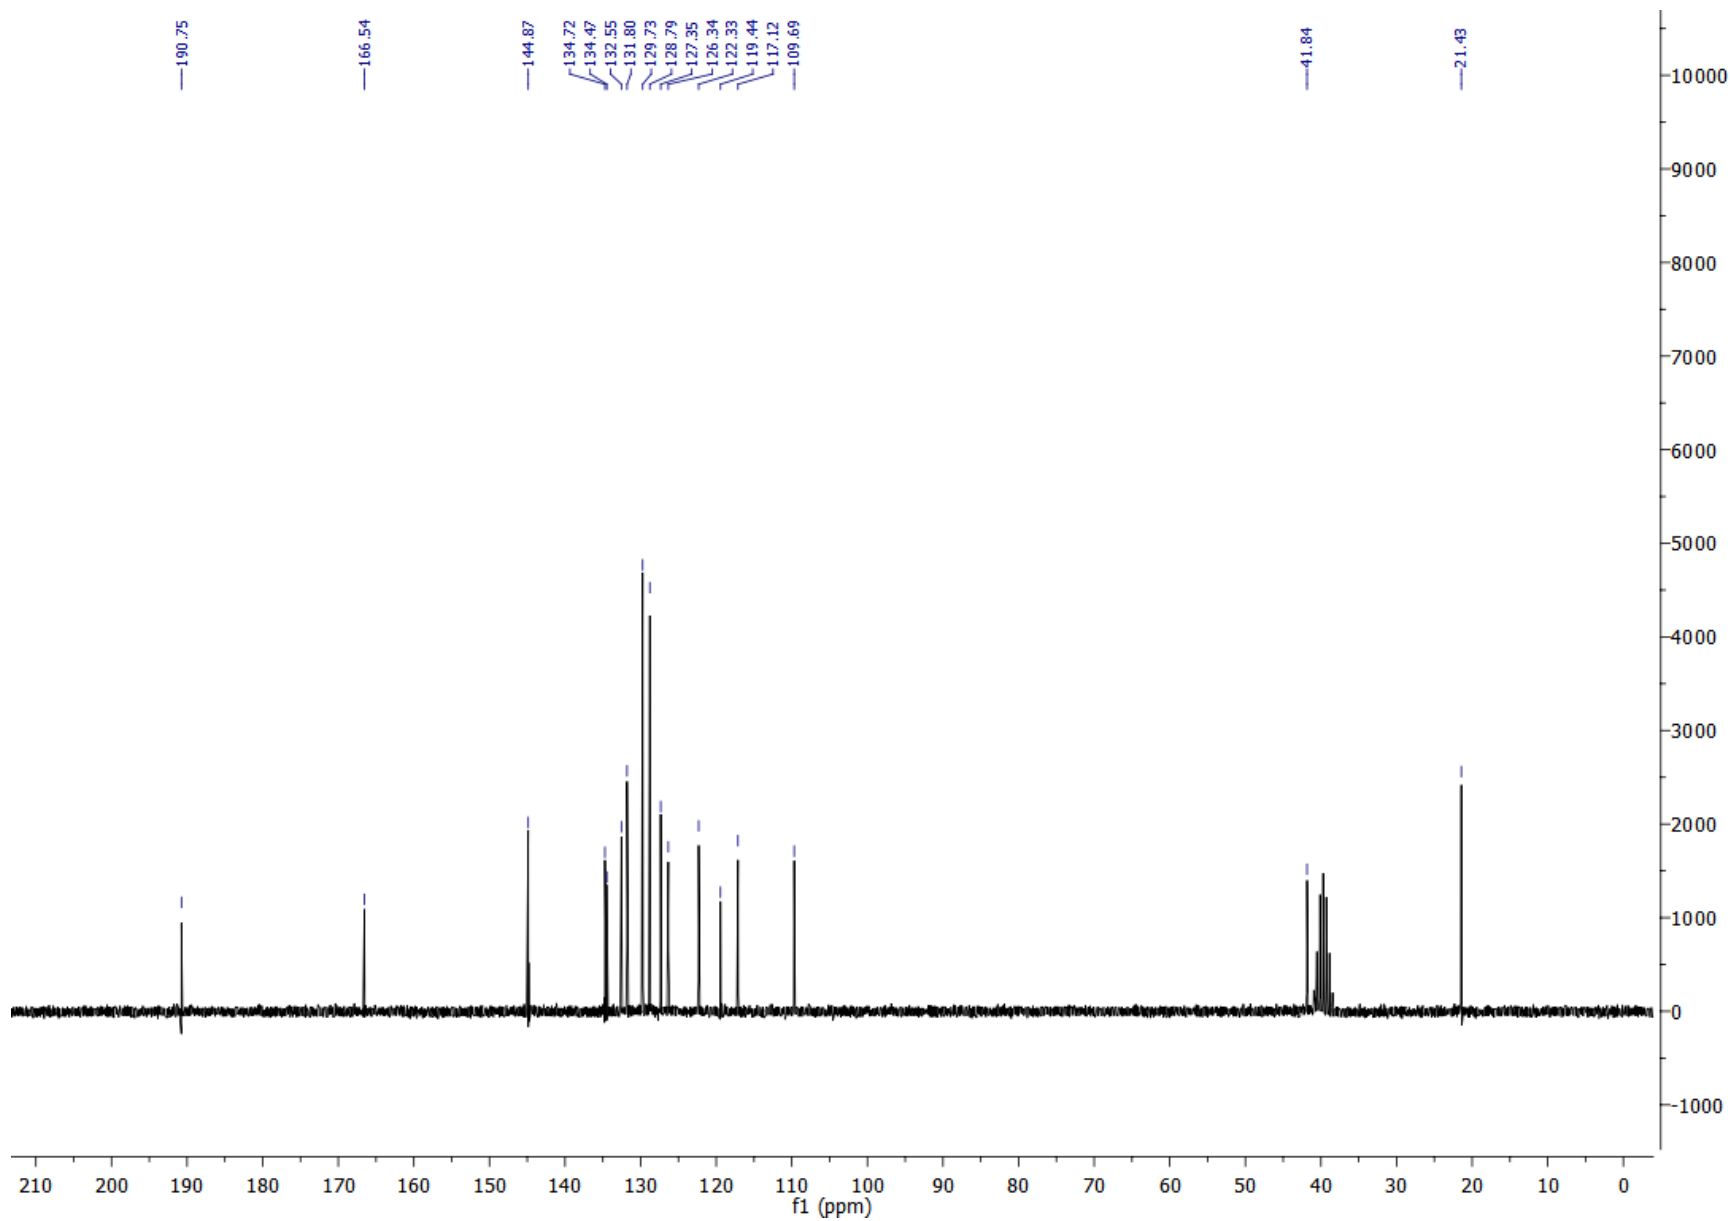

Figure S6.  $^{13}\text{C}$  NMR spectrum of **4b**

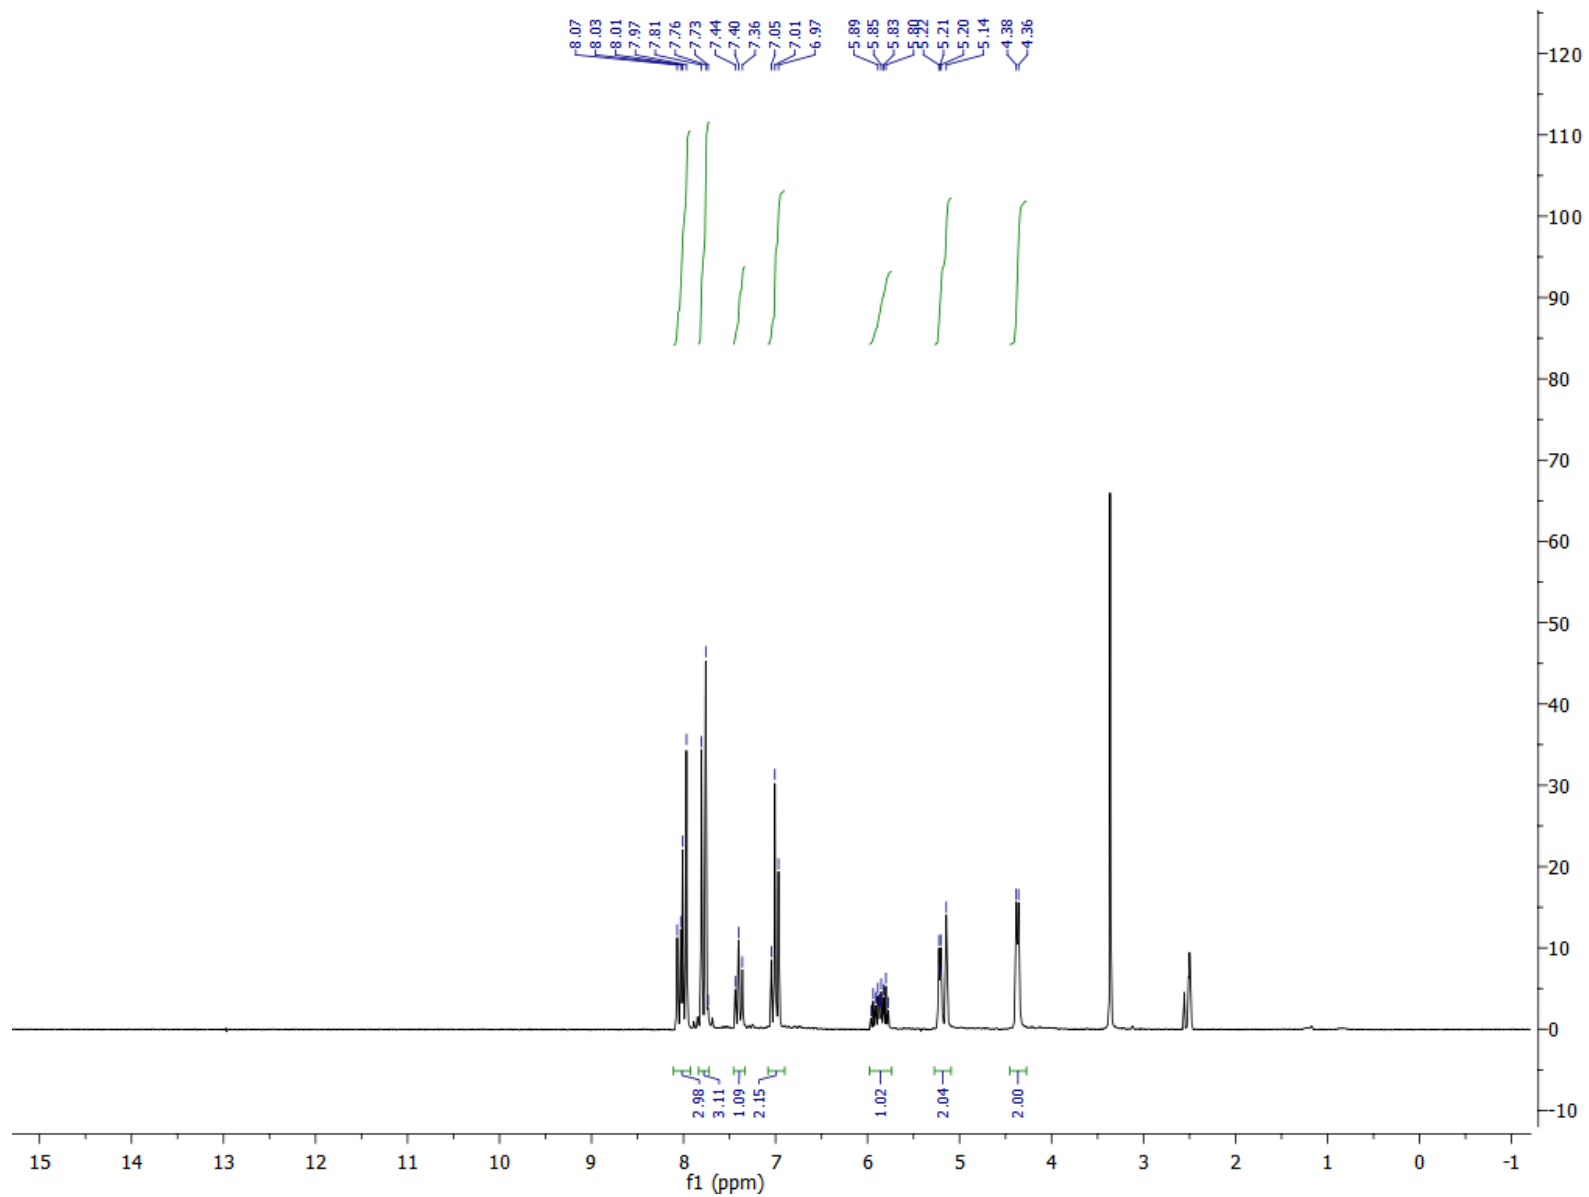

Figure S7.  $^1\text{H}$  NMR spectrum of **4c** (10 mg dissolved in 600  $\mu\text{L}$   $\text{DMSO-}d_6$ )

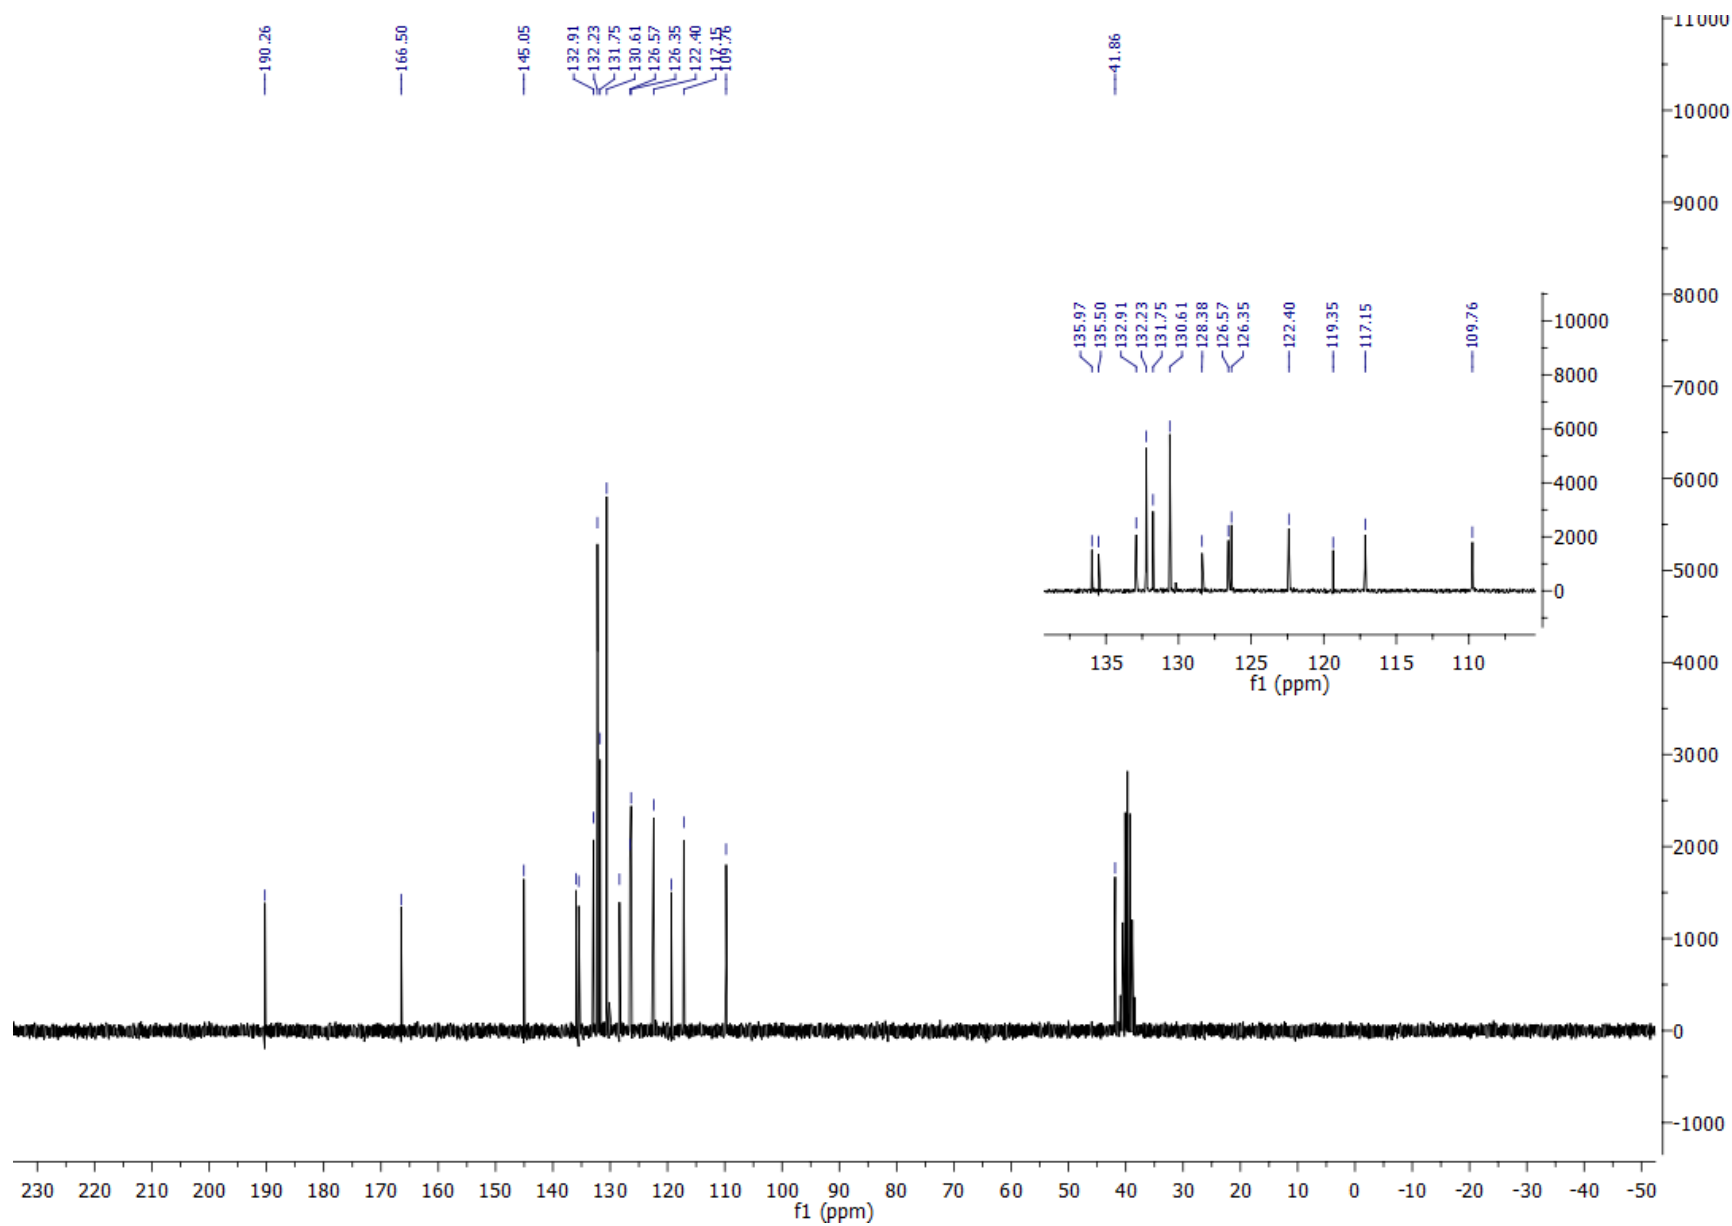

Figure S8.  $^{13}\text{C}$  NMR spectrum of 4c

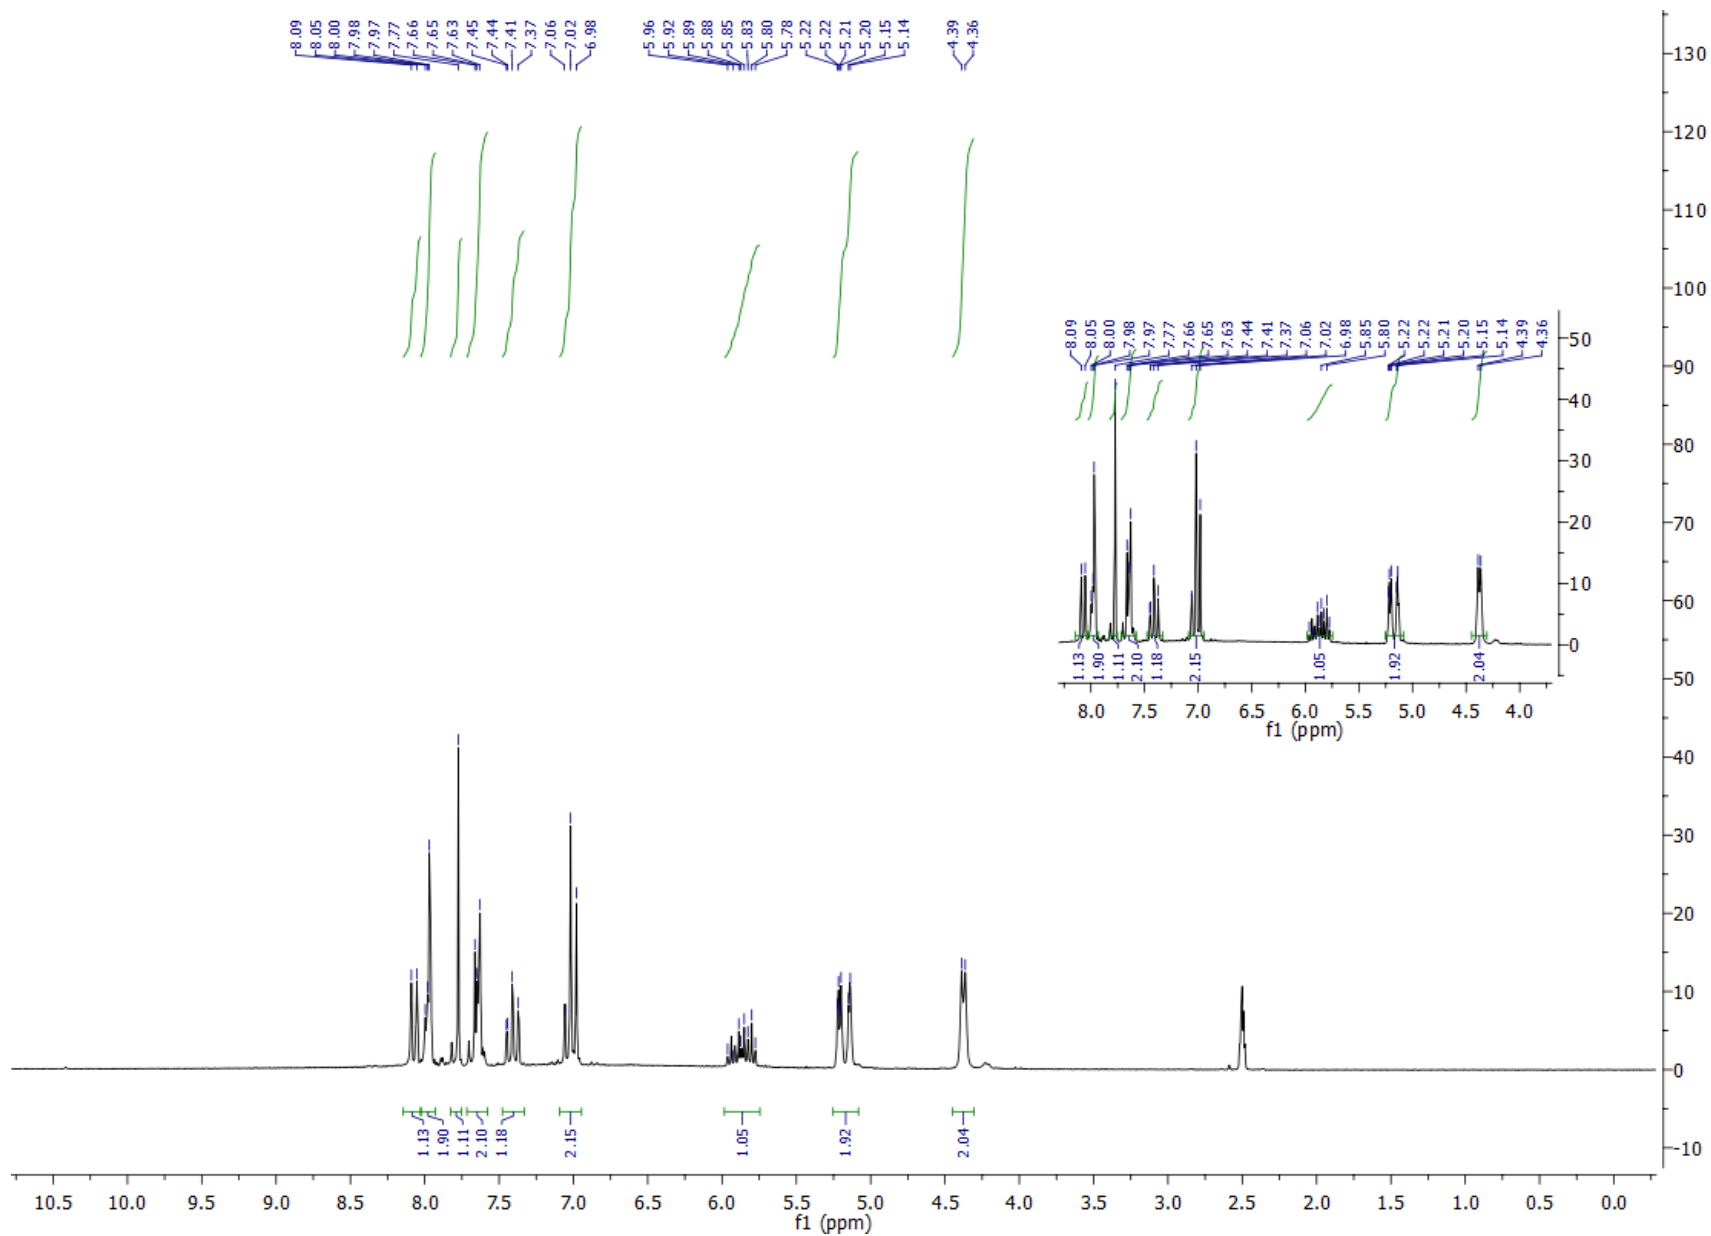

Figure S9.  $^1\text{H}$  NMR spectrum of **4d**

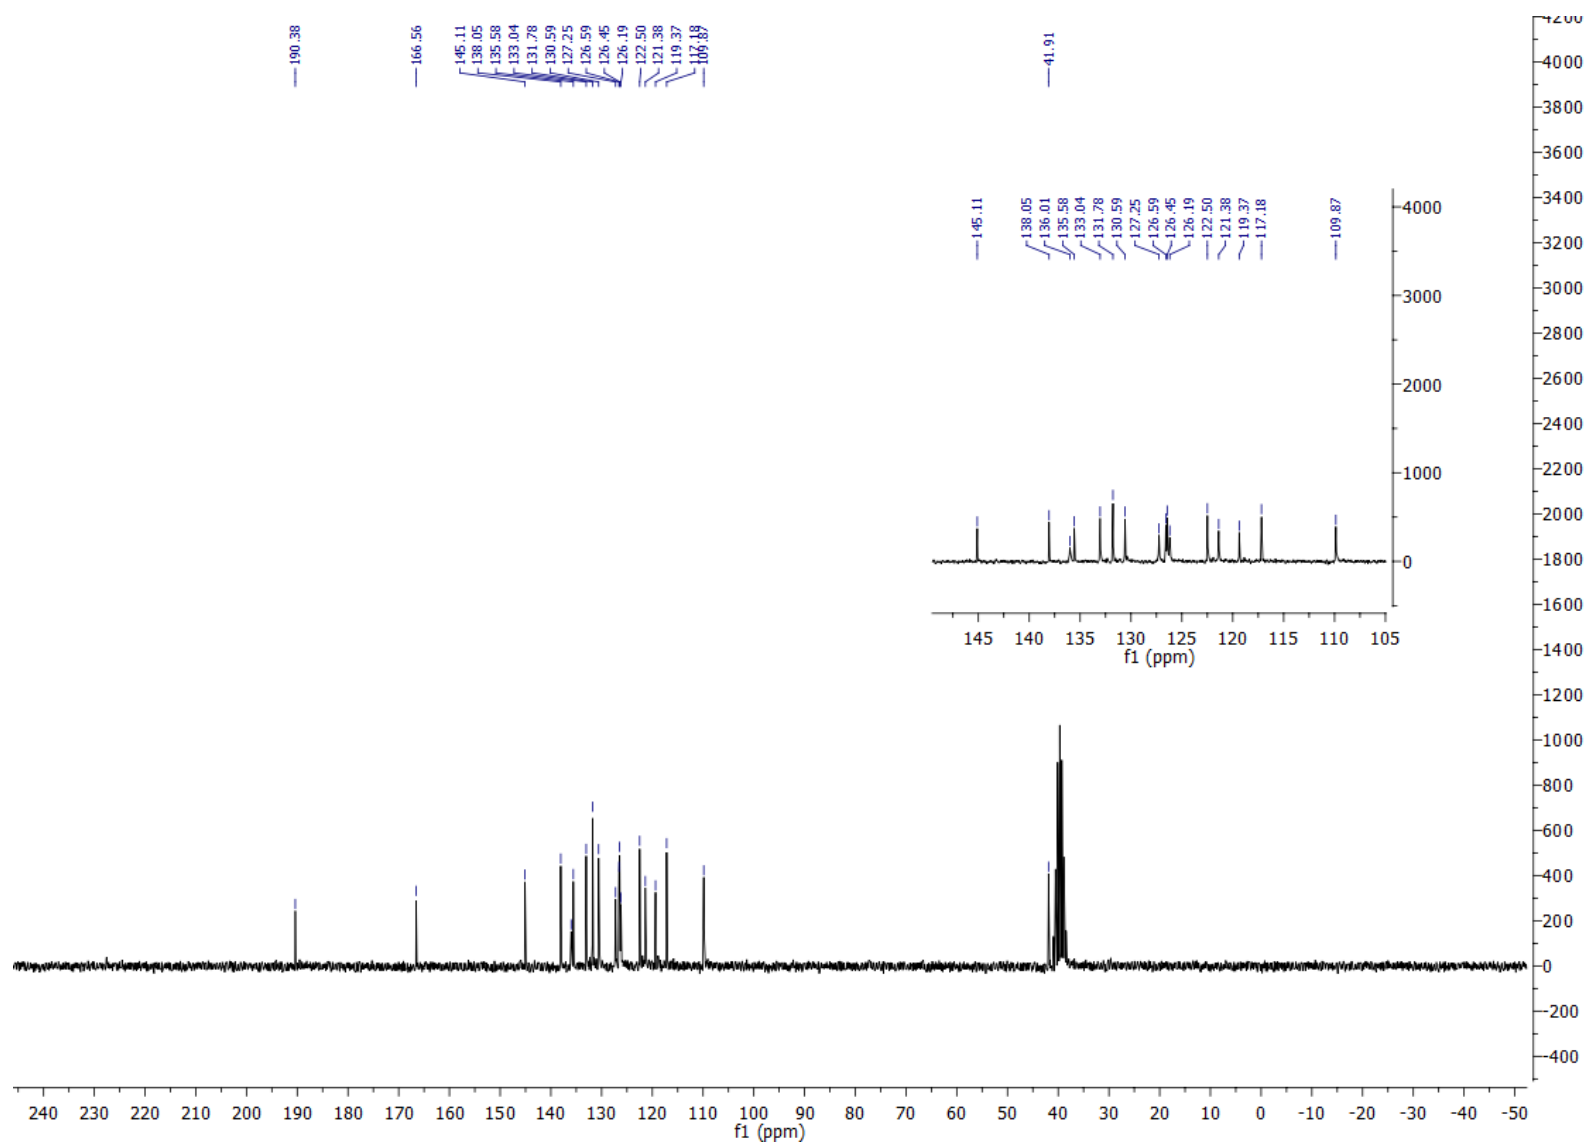

Figure S10.  $^{13}\text{C}$  NMR spectrum of 4d

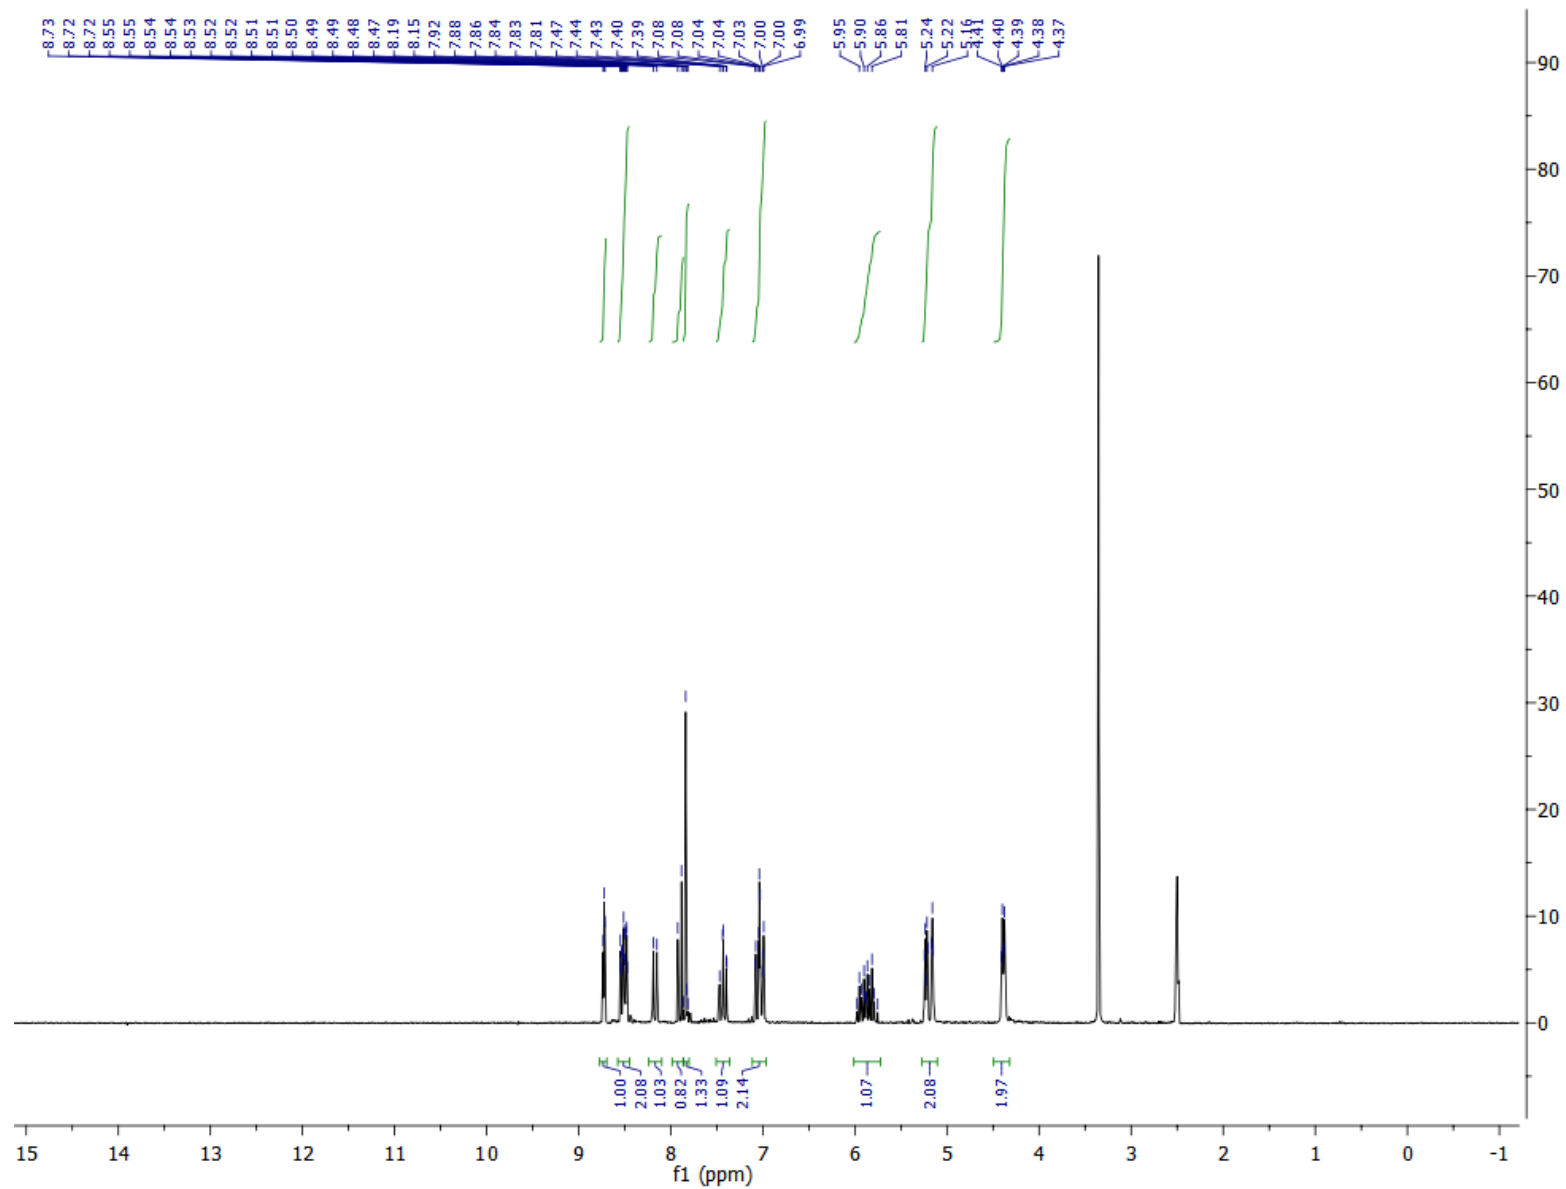

Figure S11.  $^1\text{H}$  NMR spectrum of **4e** (10 mg of **4e** dissolved in 600  $\mu\text{L}$   $\text{DMSO-}d_6$ )

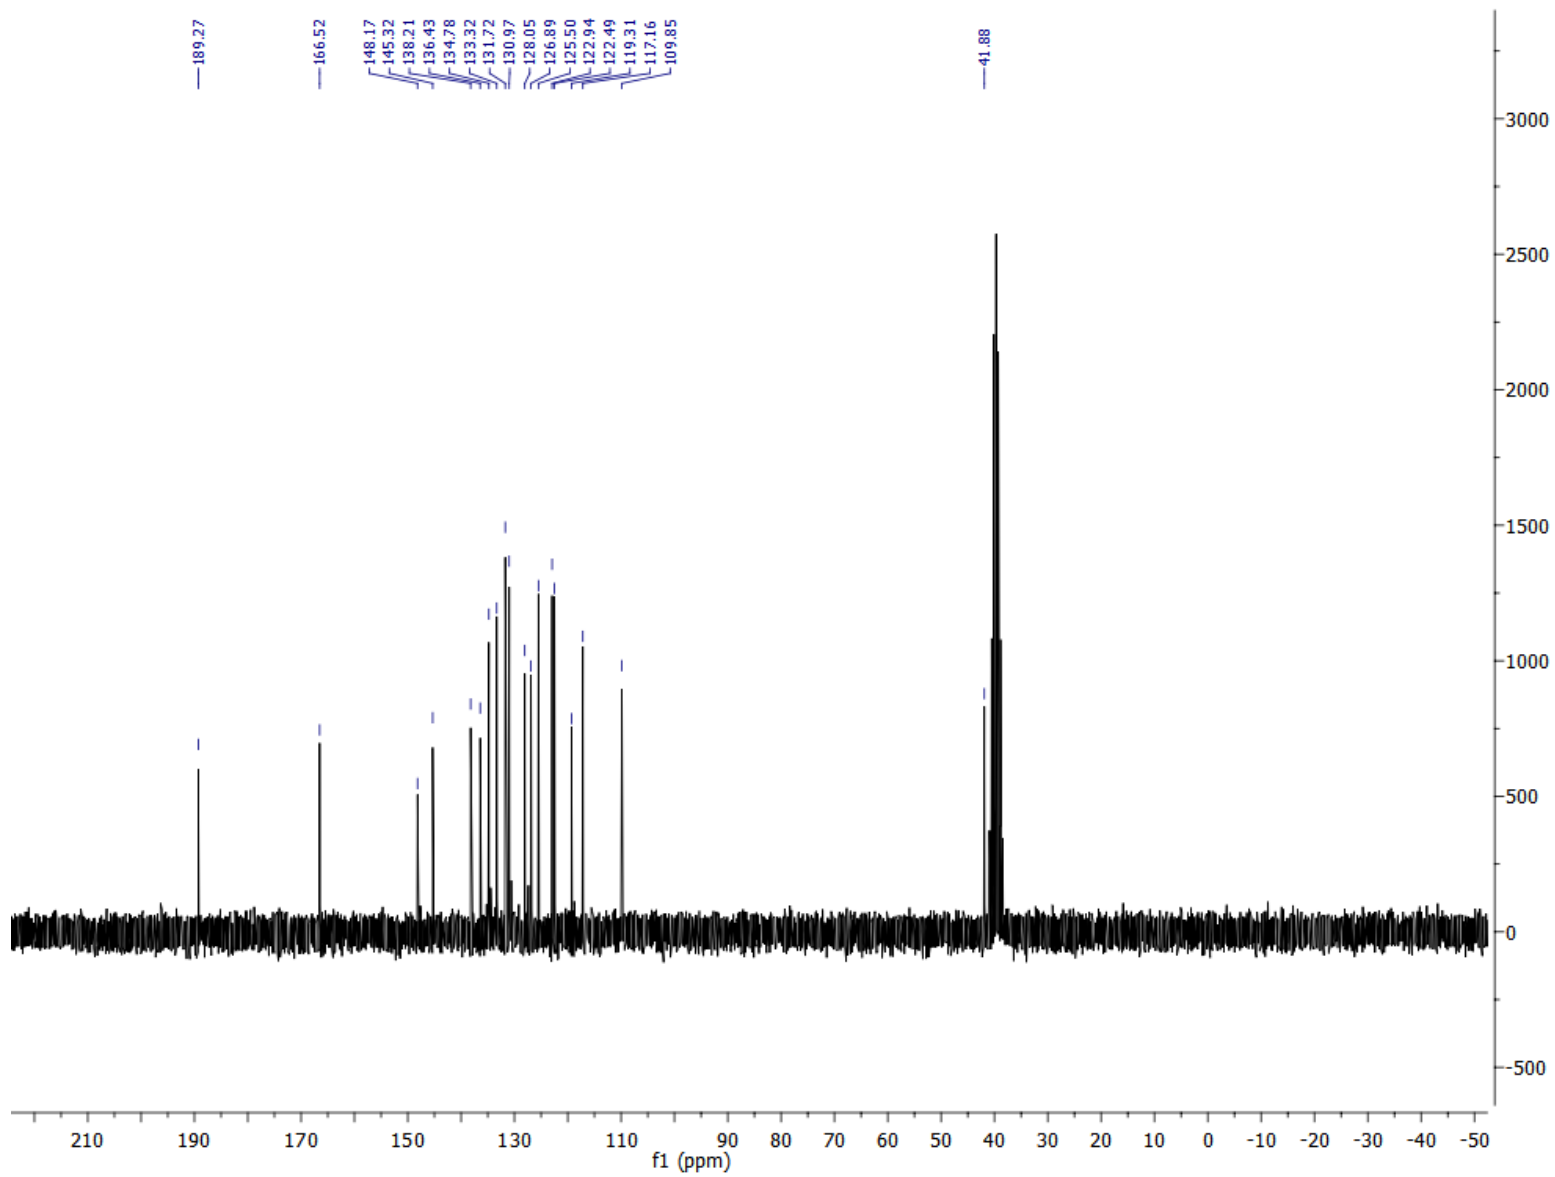

Figure S12.  $^{13}\text{C}$  NMR spectrum of 4e



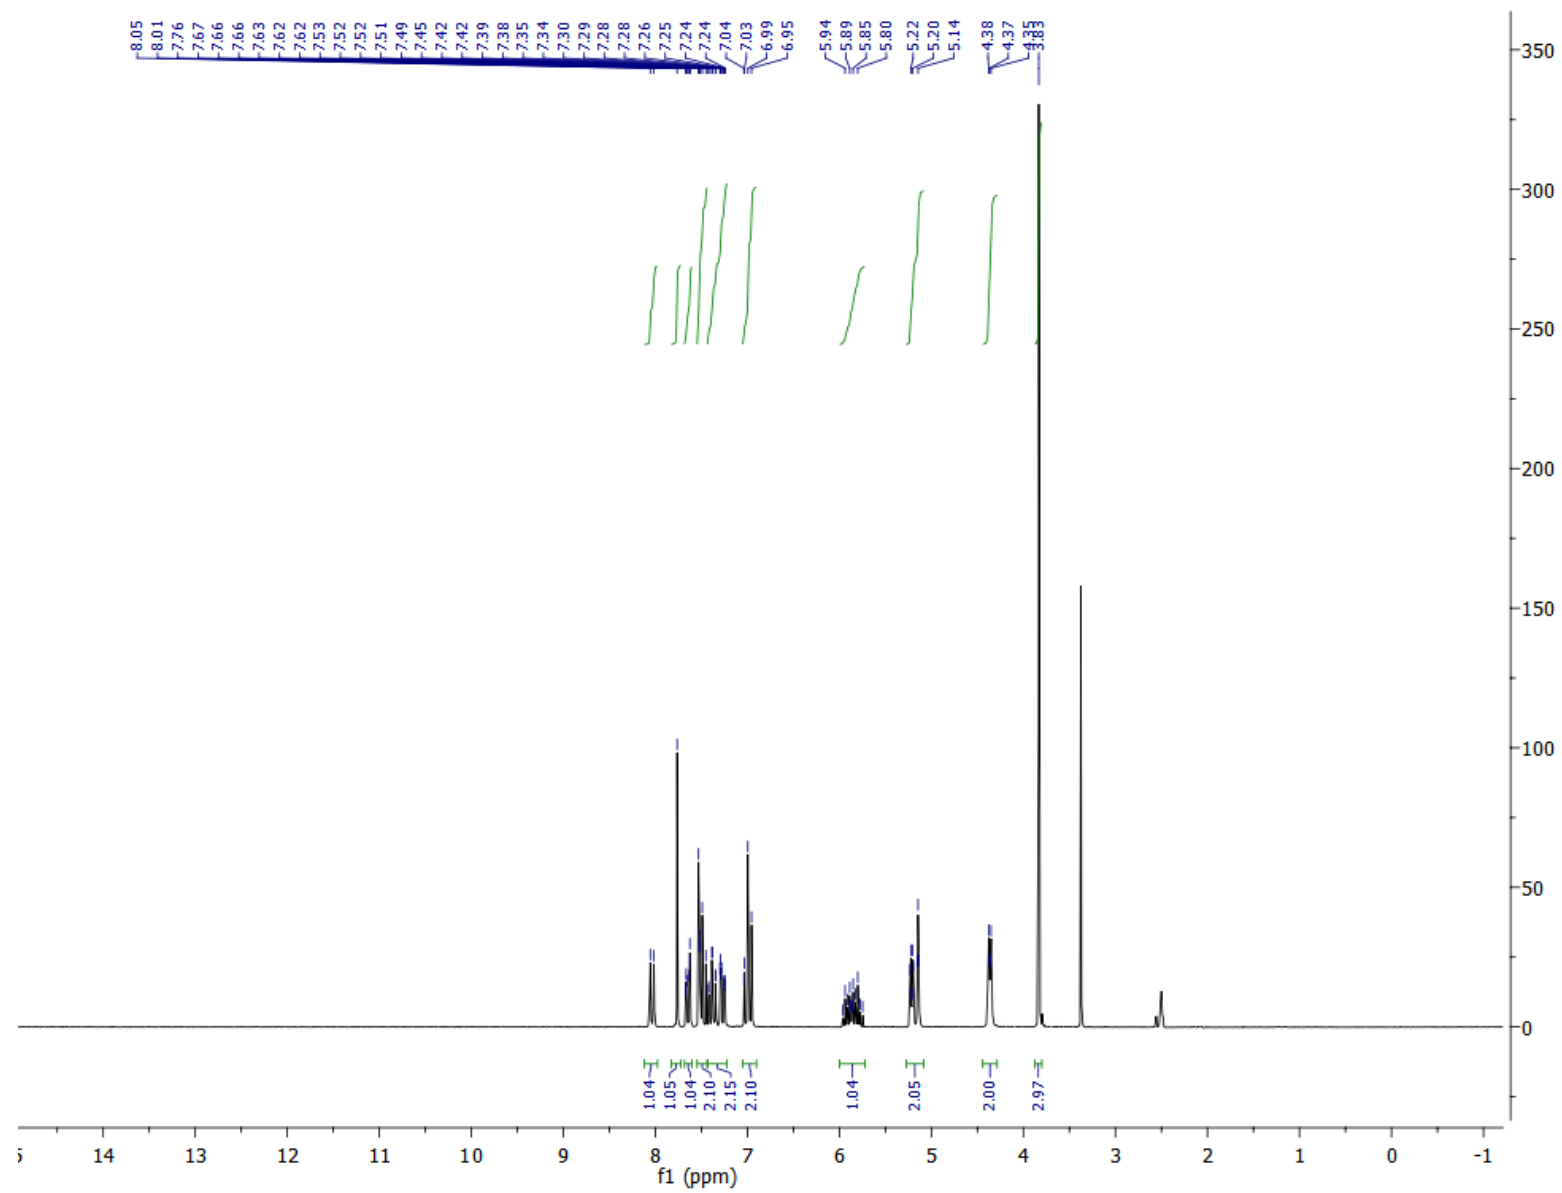

Figure S13. <sup>1</sup>H NMR spectrum of 4f

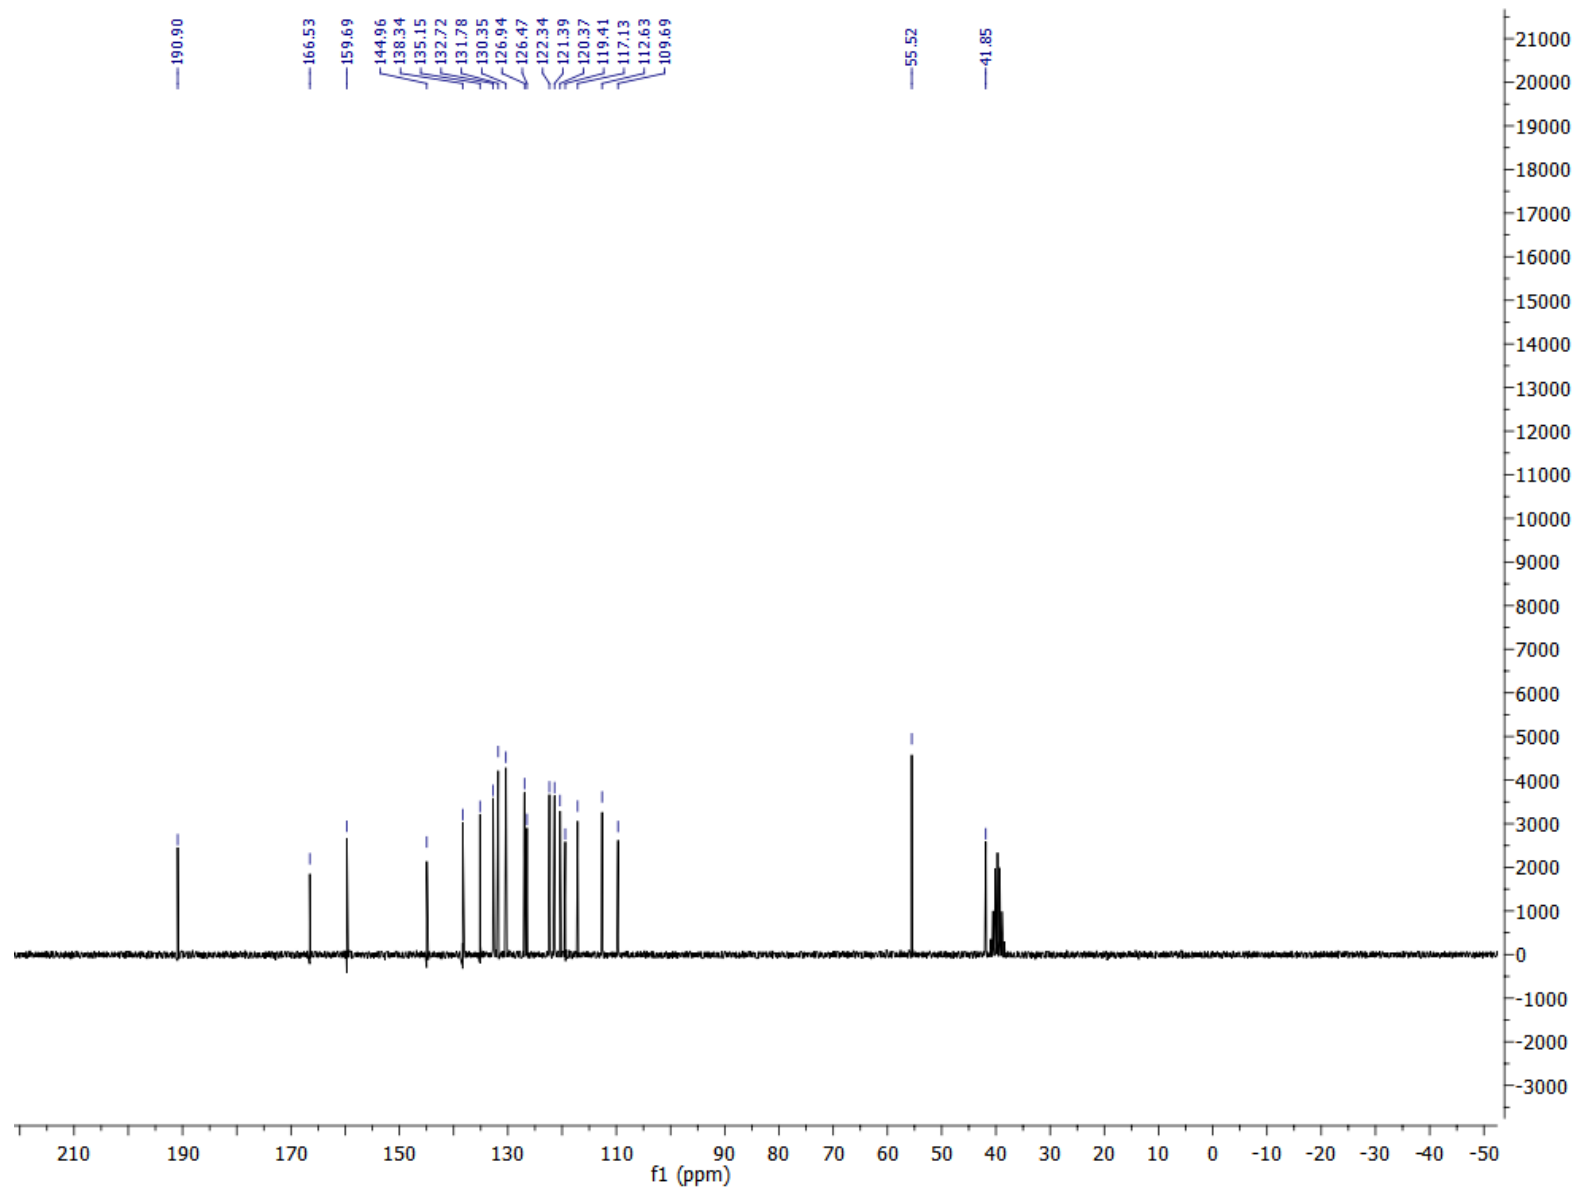

Figure S14.  $^{13}\text{C}$  NMR spectrum of 4f

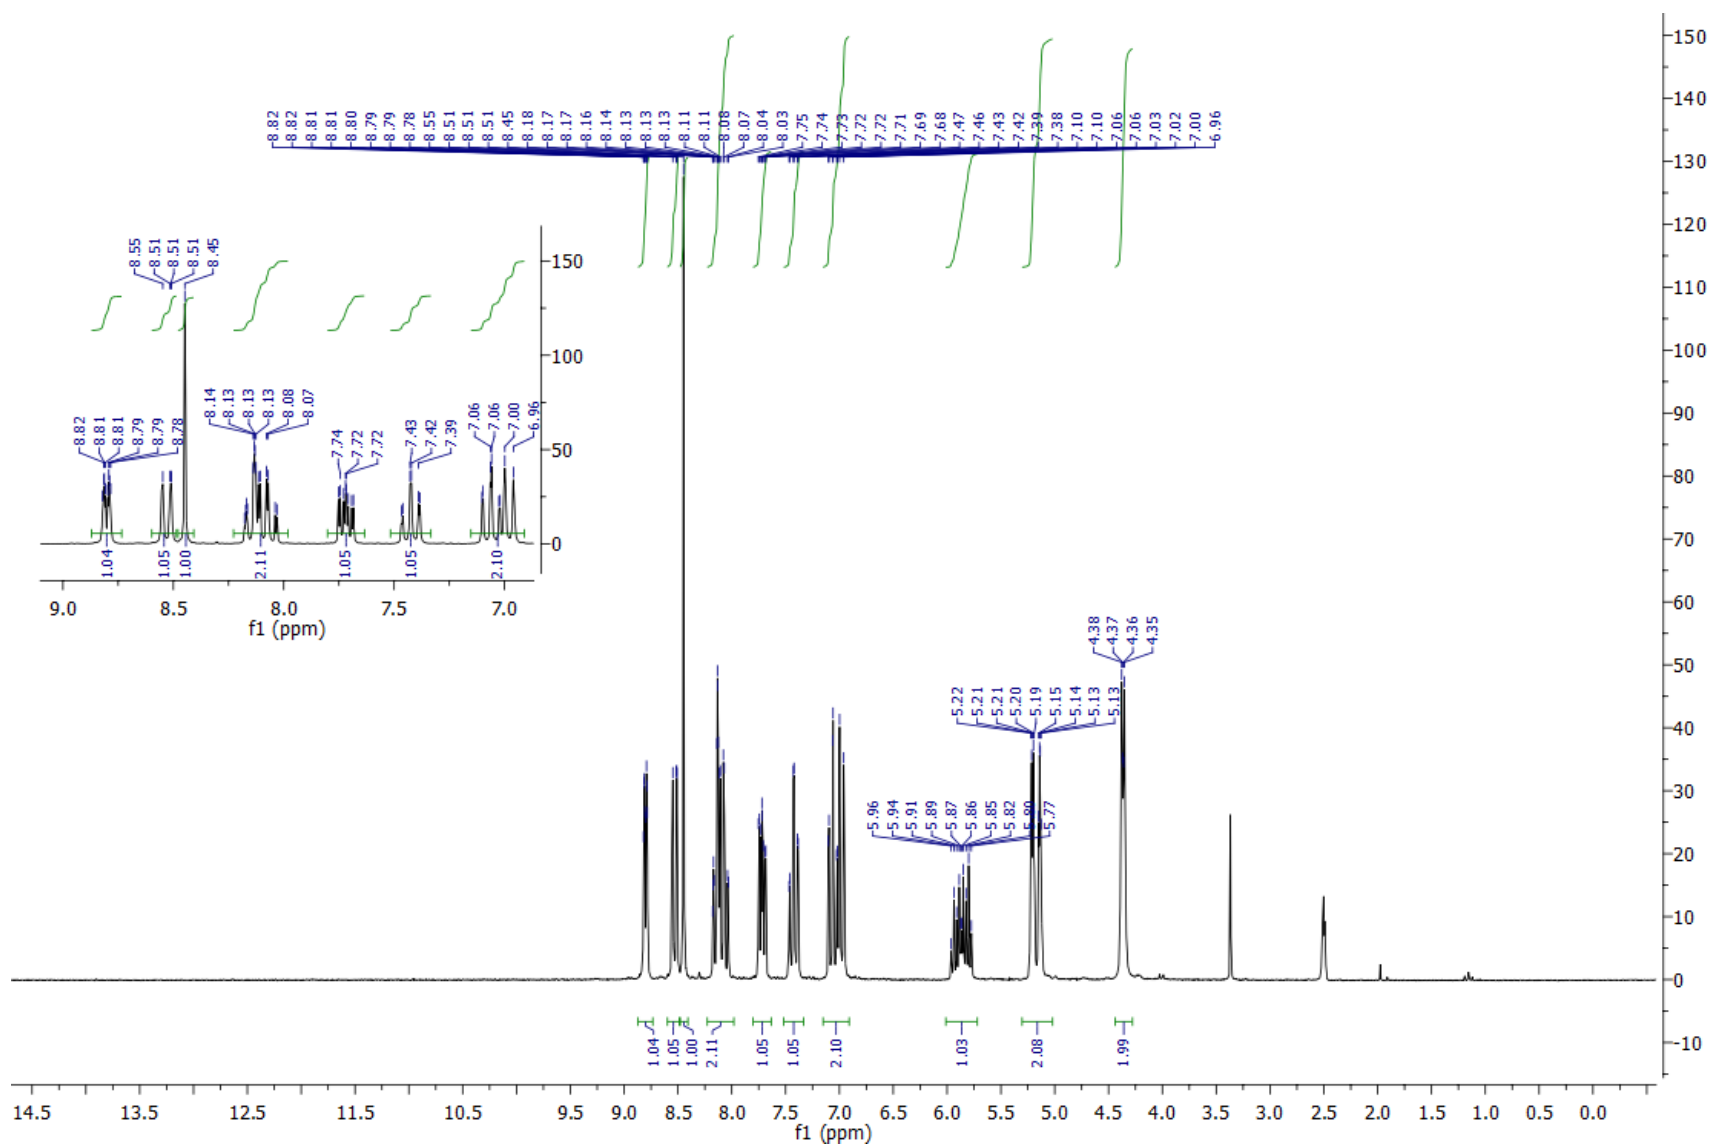

Figure S15. <sup>1</sup>H NMR spectrum of **4g**

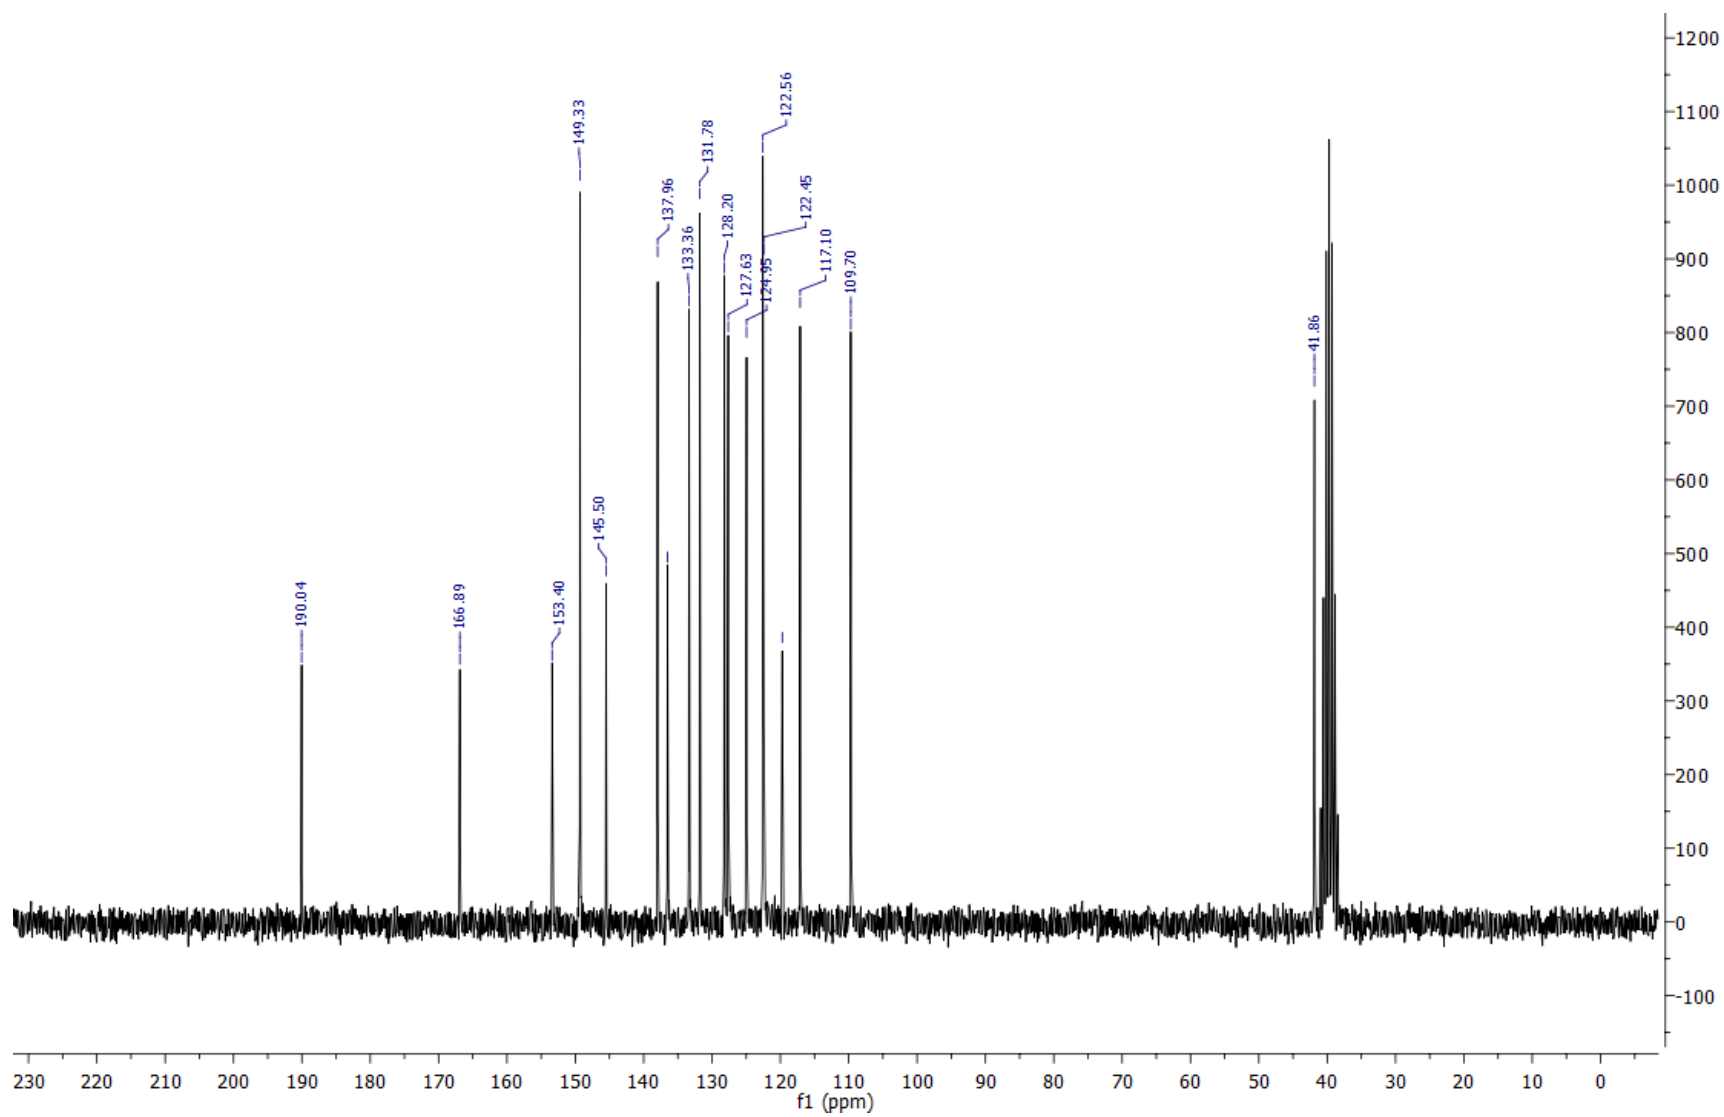

Figure S16.  $^{13}\text{C}$  NMR spectrum of 4g

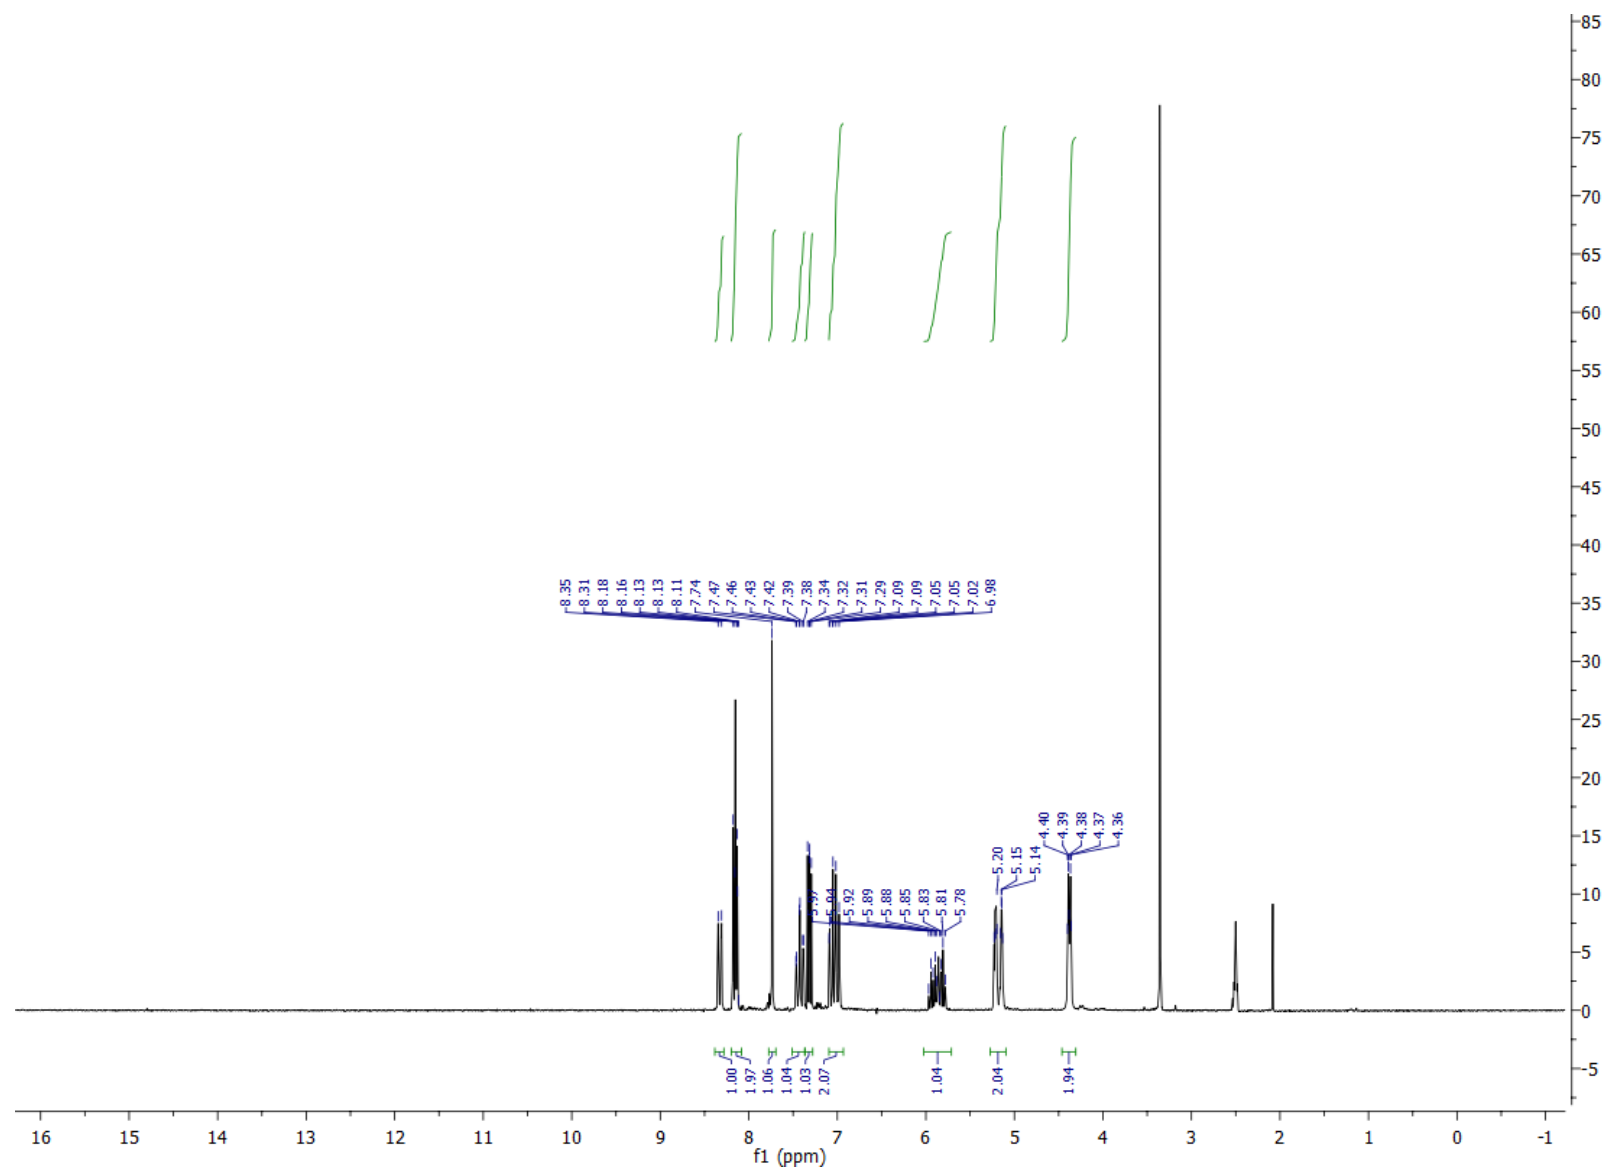

Figure S17.  $^1\text{H}$  NMR spectrum of **4h** (residual solvent acetone at 2.10 ppm, reference J. Org. Chem, 1997, 62(21), 7513)

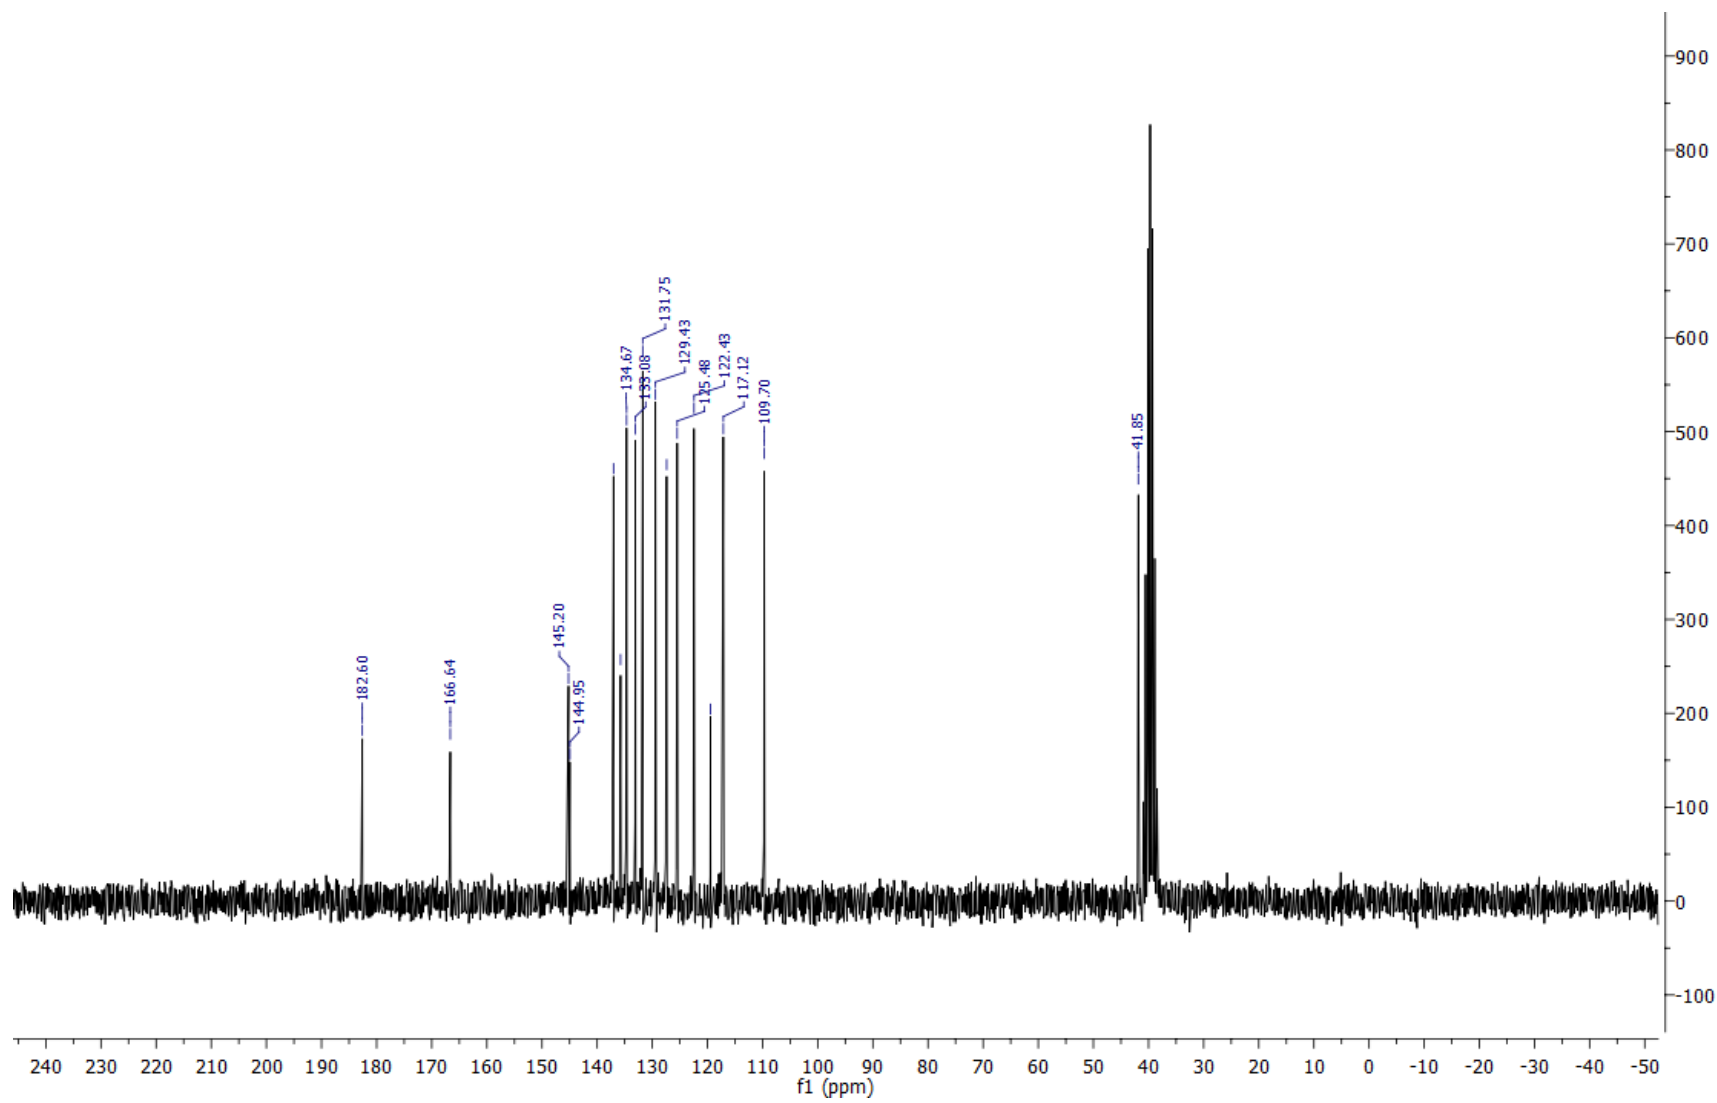

Figure S18.  $^{13}\text{C}$  NMR spectrum of 4h

### 3. MS spectra of 4a-h

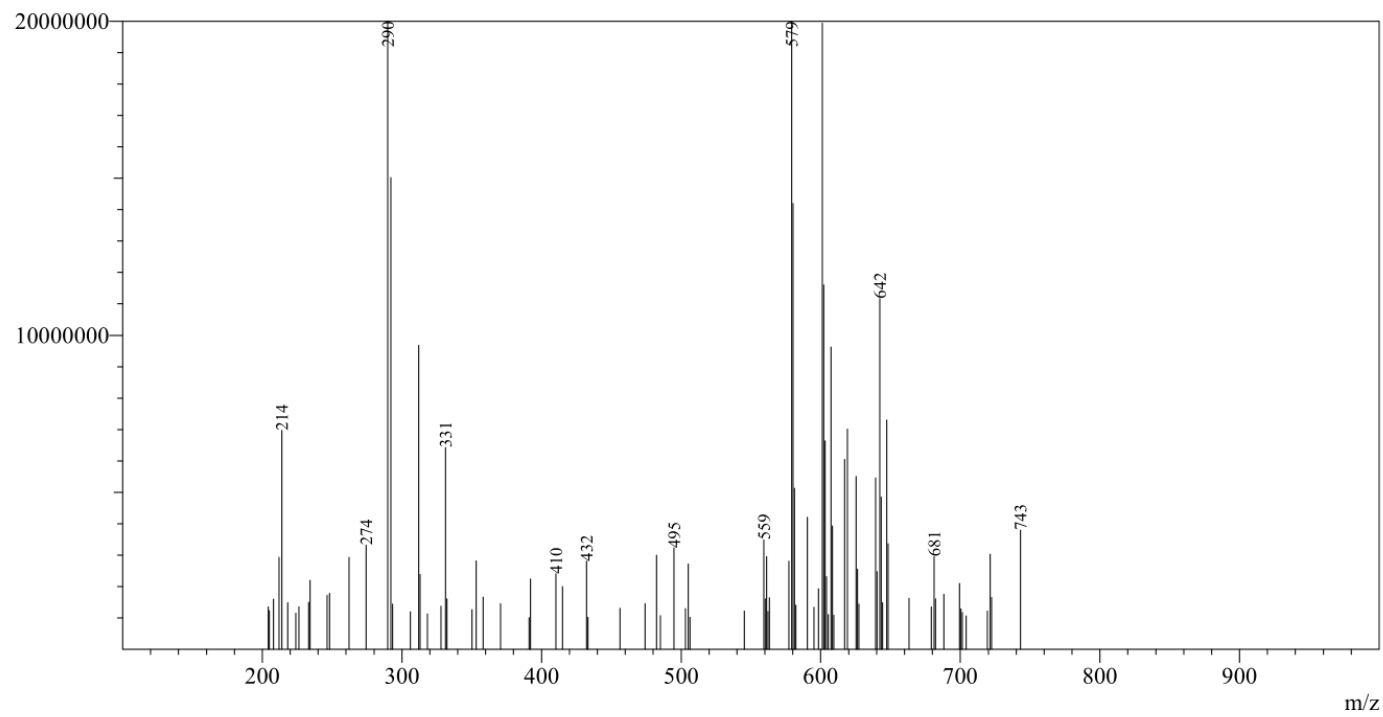

Figure S19. MS spectrum of 4a

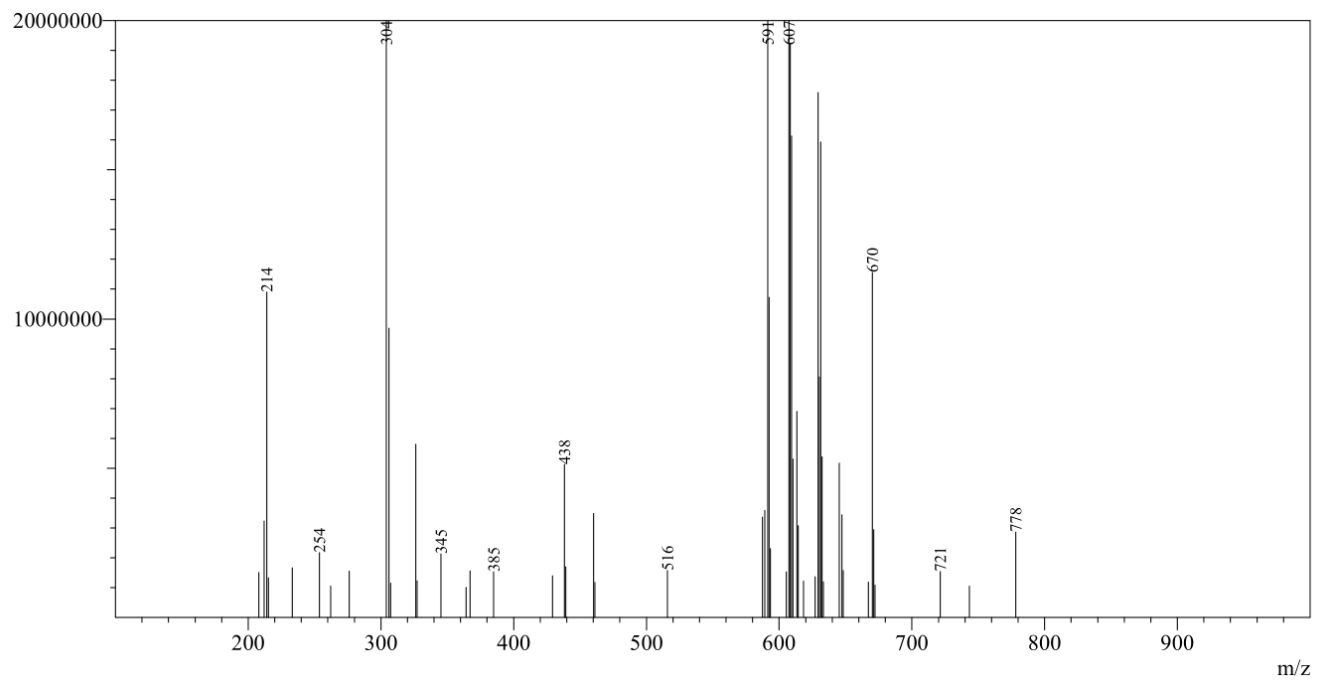

**Figure S20.** MS spectrum of **4b**



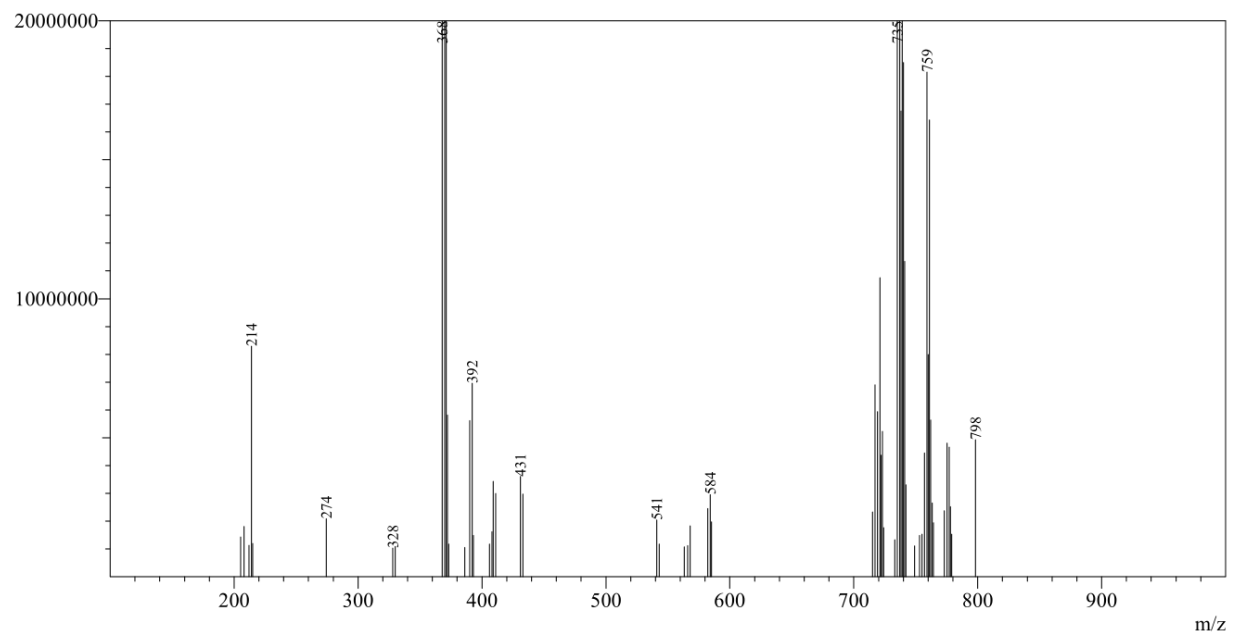

**Figure S21.** MS spectrum of **4c**

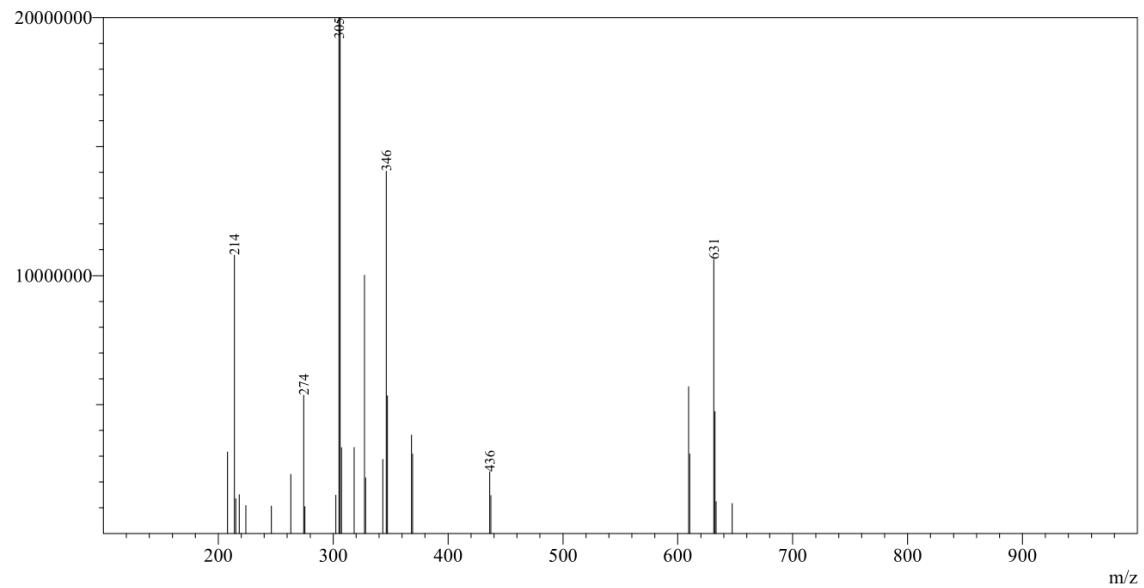

Figure S22. MS spectrum of 4d

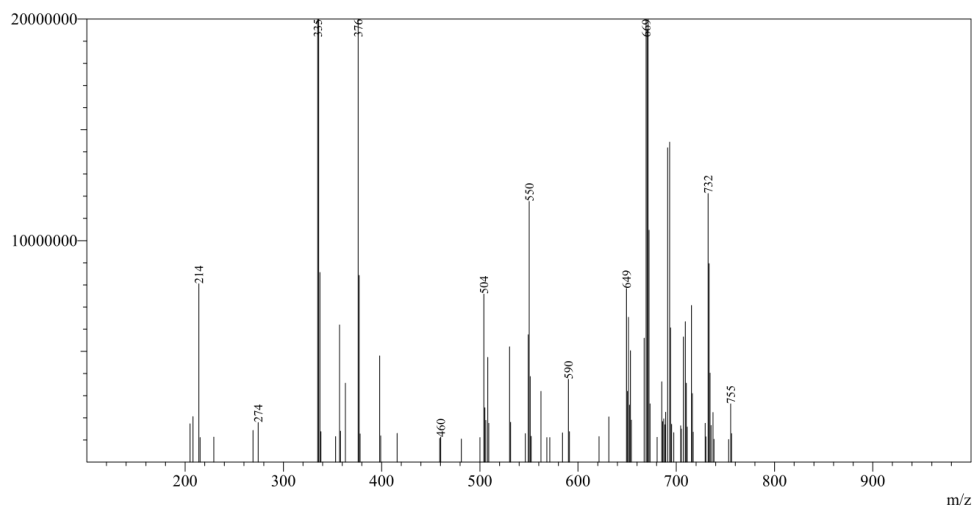

Figure S23. MS spectrum of 4e

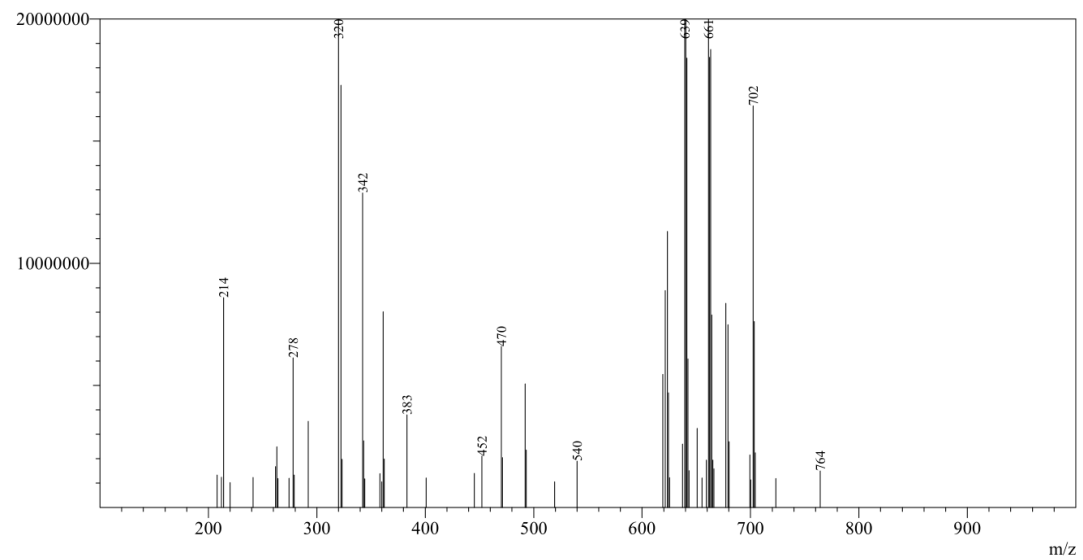

Figure S24. MS spectrum of 4f

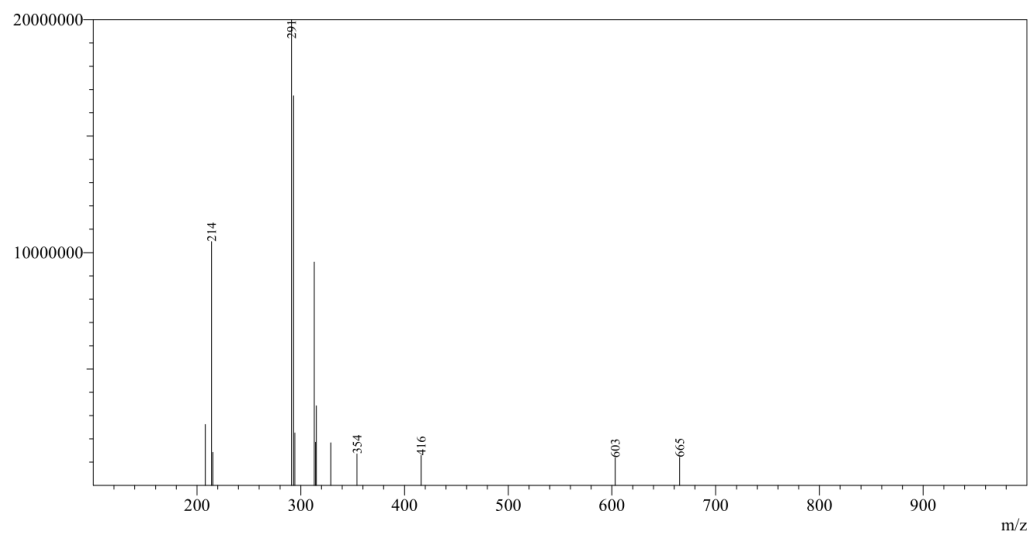

Figure S25. MS spectrum of 4g

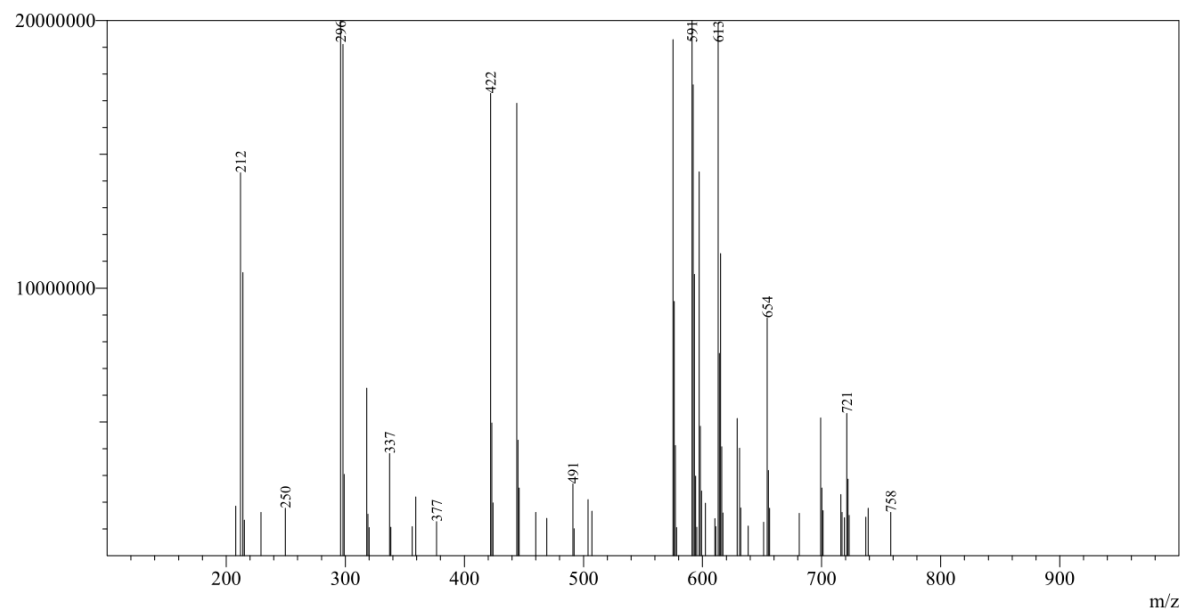

Figure S26. MS spectrum of 4h

#### 4. IR spectra of 4a-h

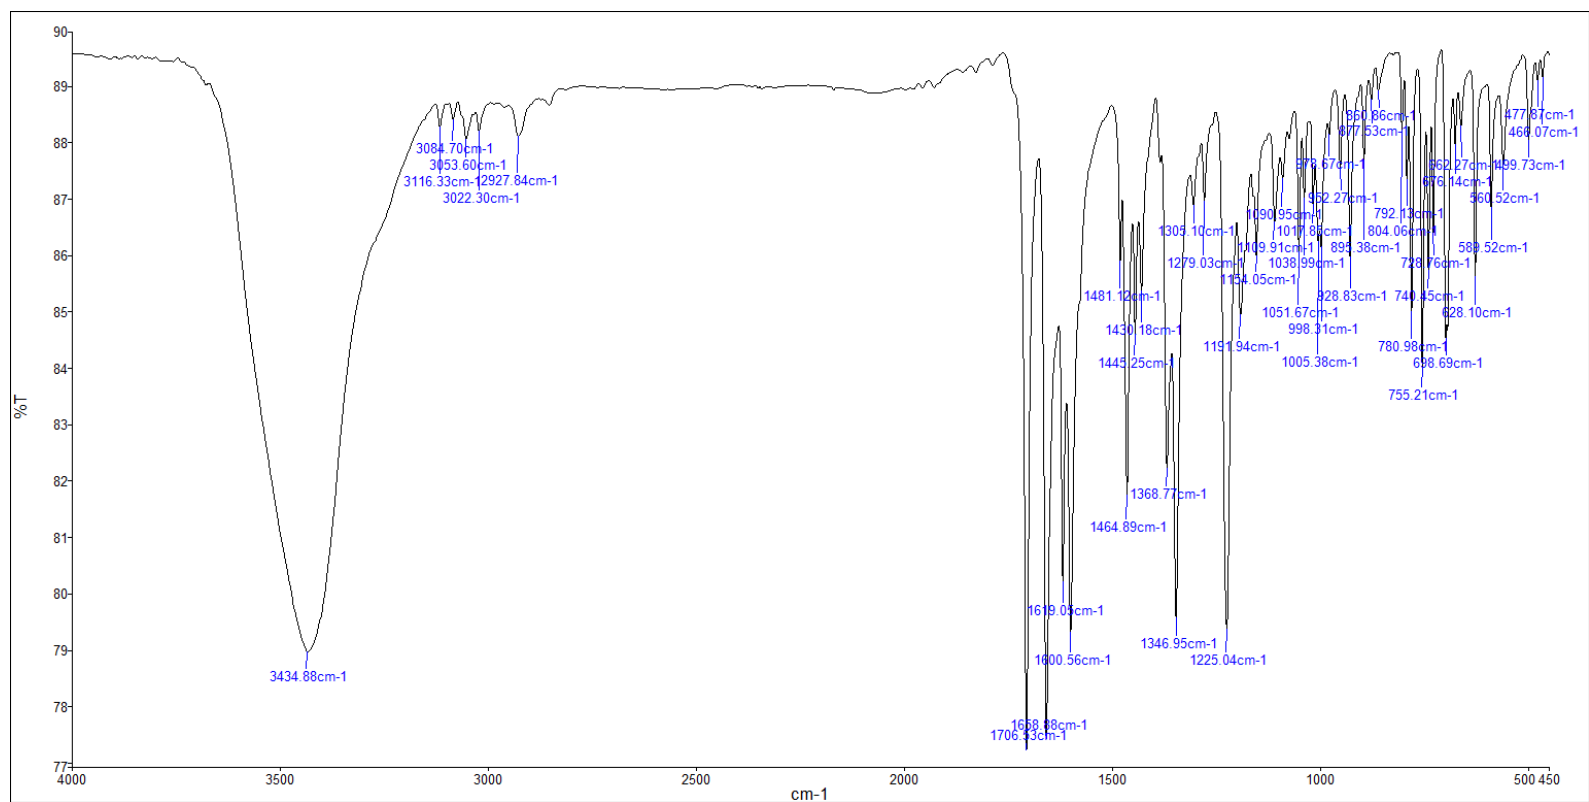

Figure S27. IR spectrum of 4a

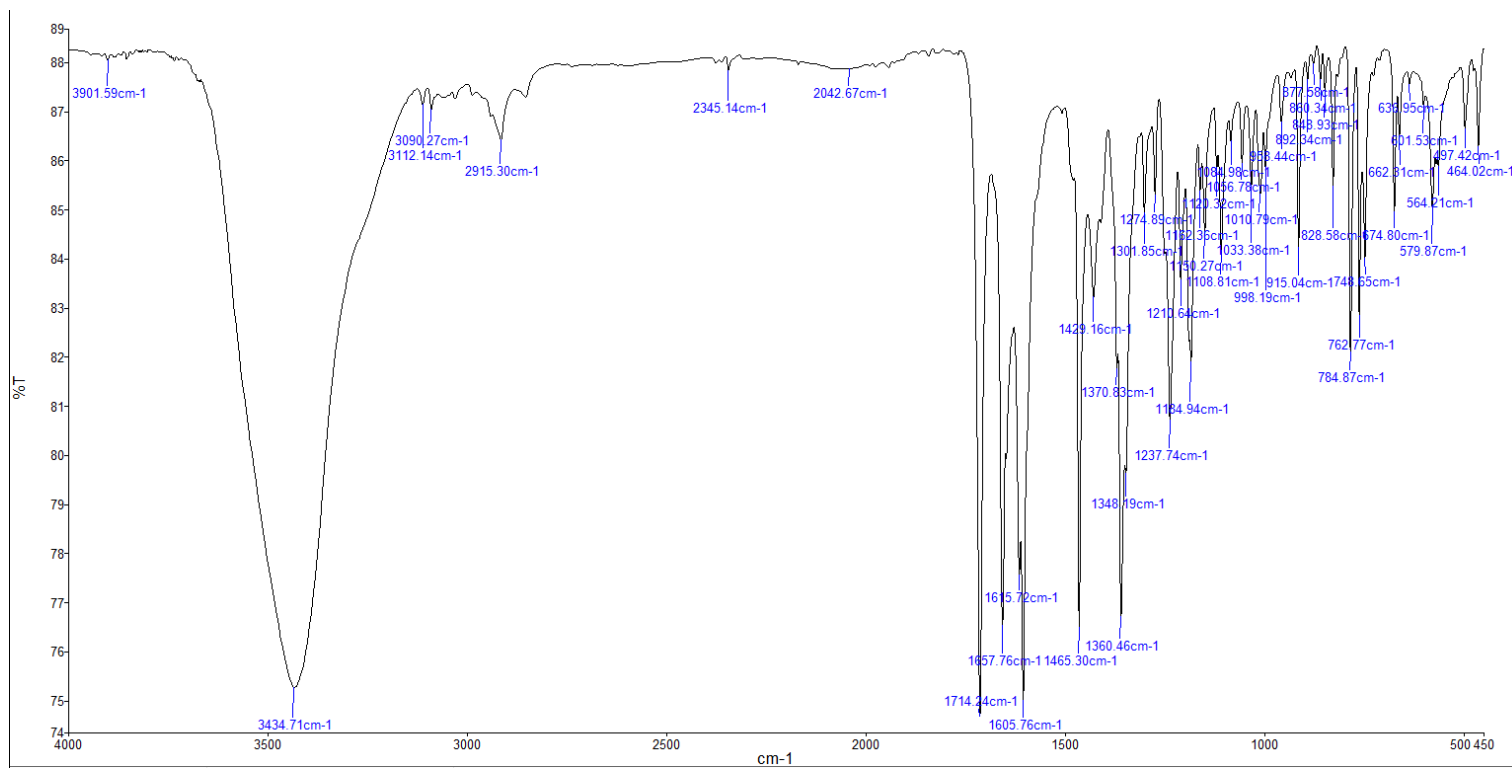

Figure S28. IR spectrum of 4b

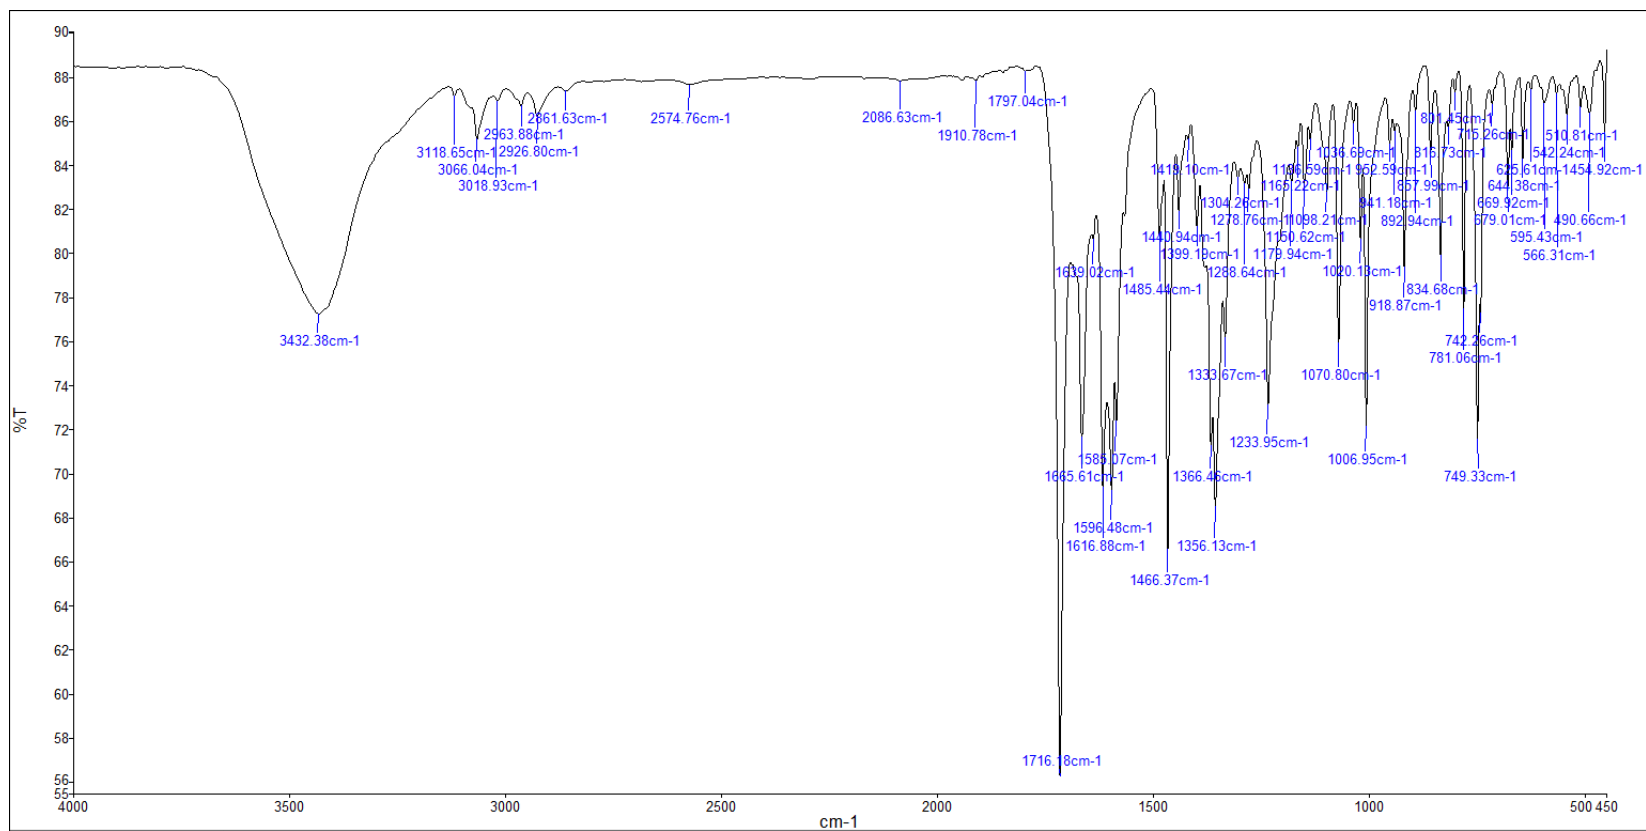

Figure S29. IR spectrum of 4c

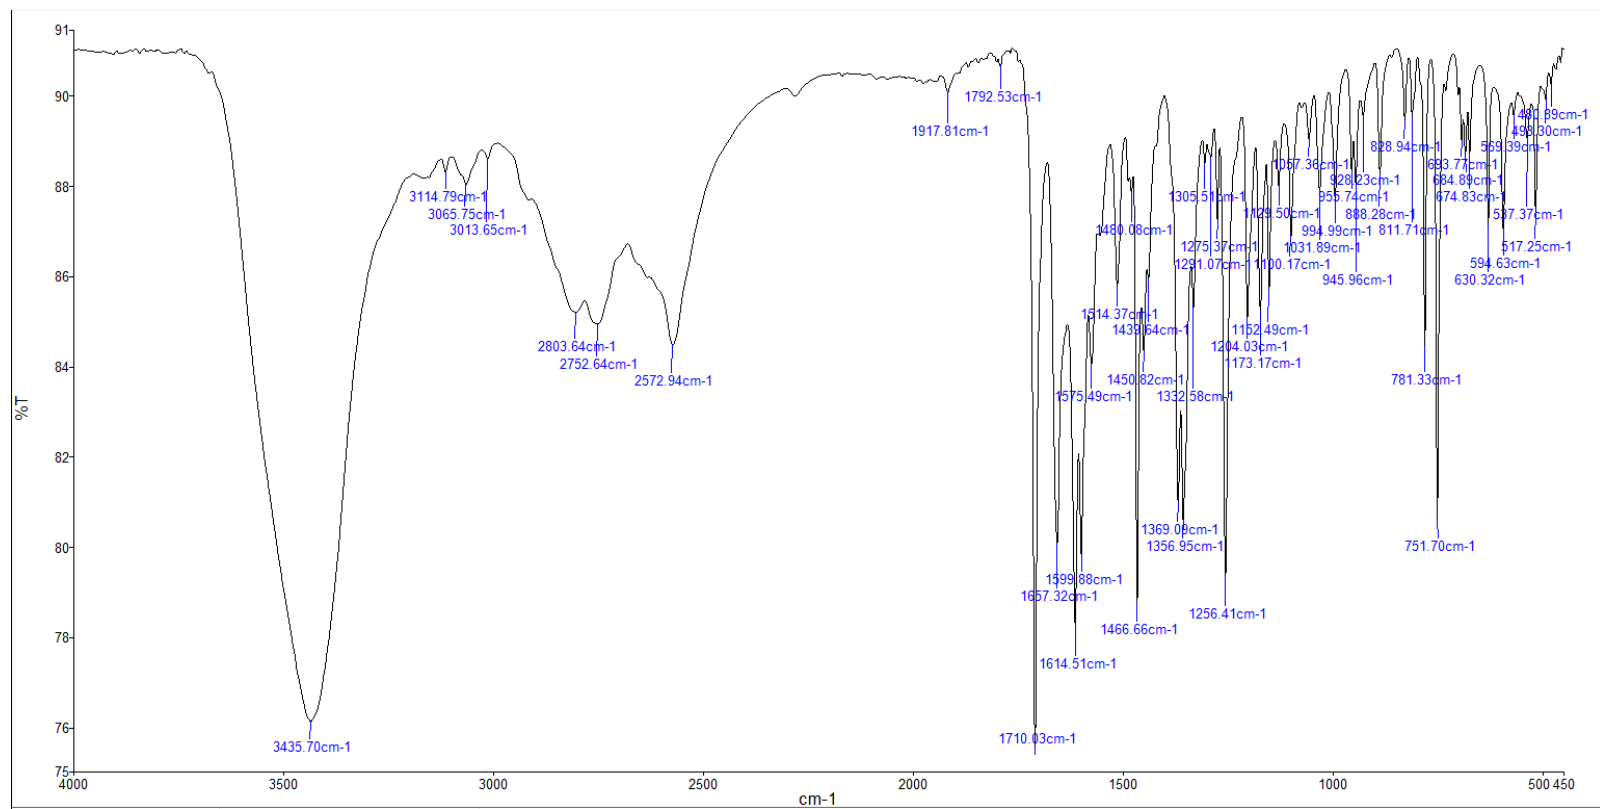

Figure S30. IR spectrum of 4d



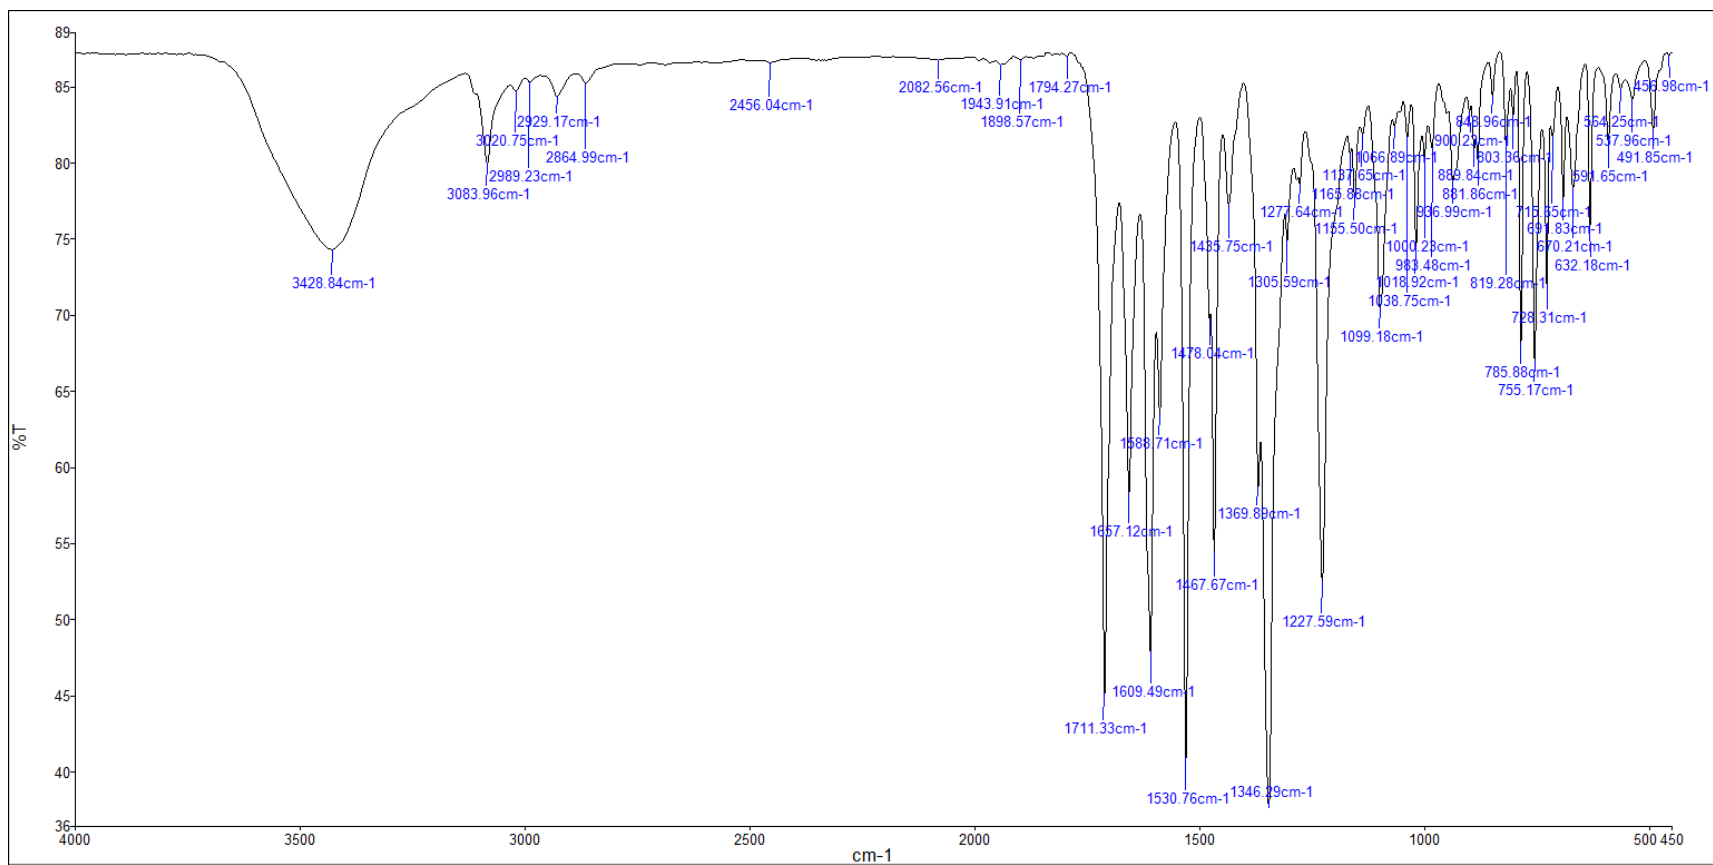

Figure S31. IR spectrum of 4e

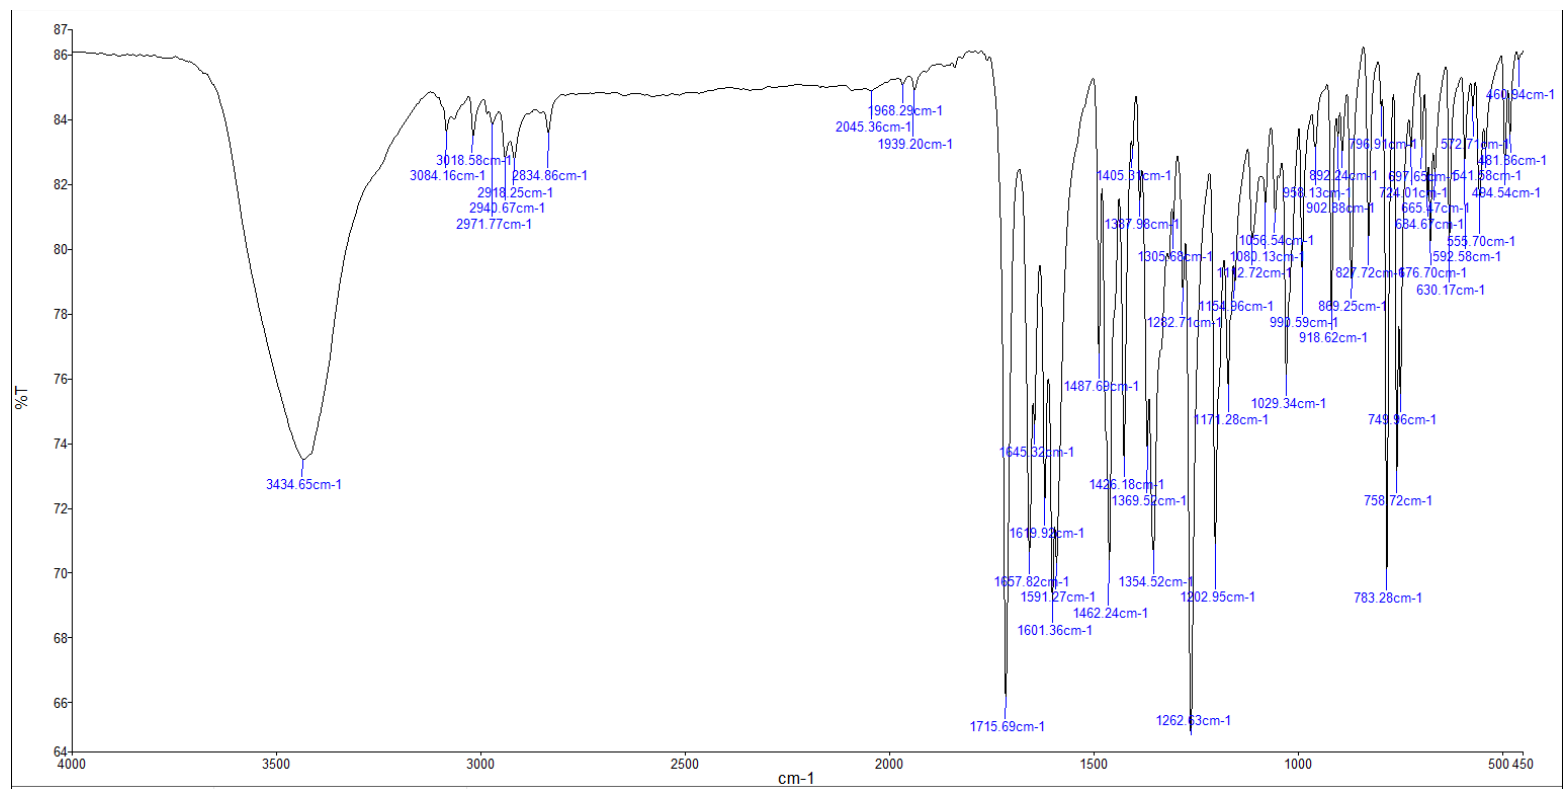

Figure S32. IR spectrum of 4f

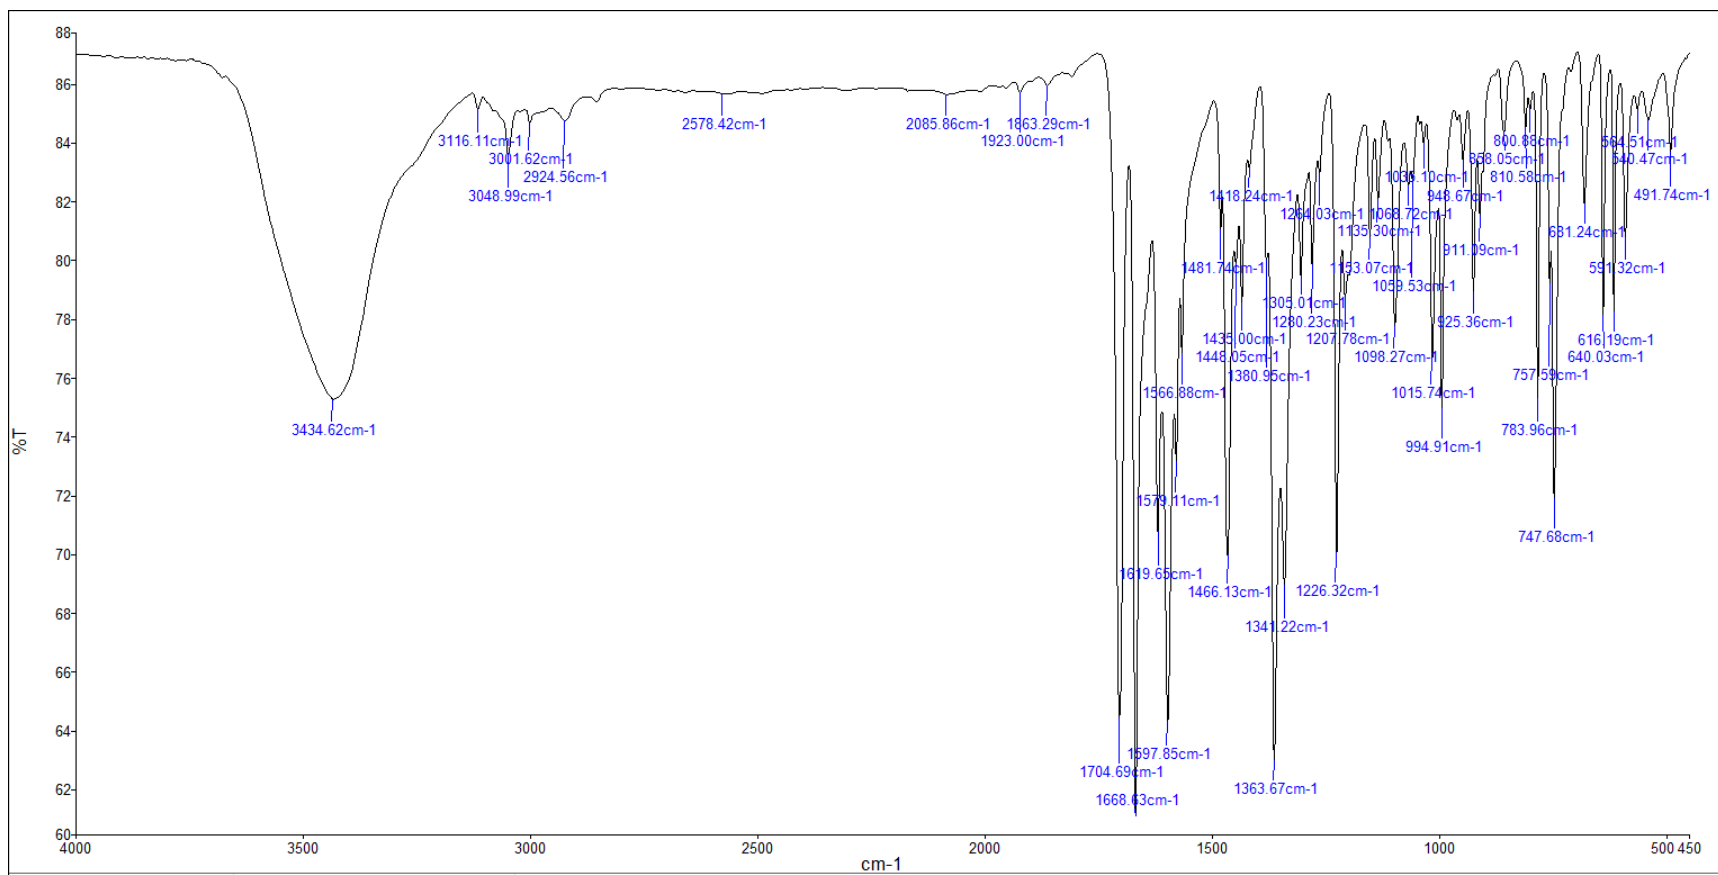

Figure S33. IR spectrum of 4g

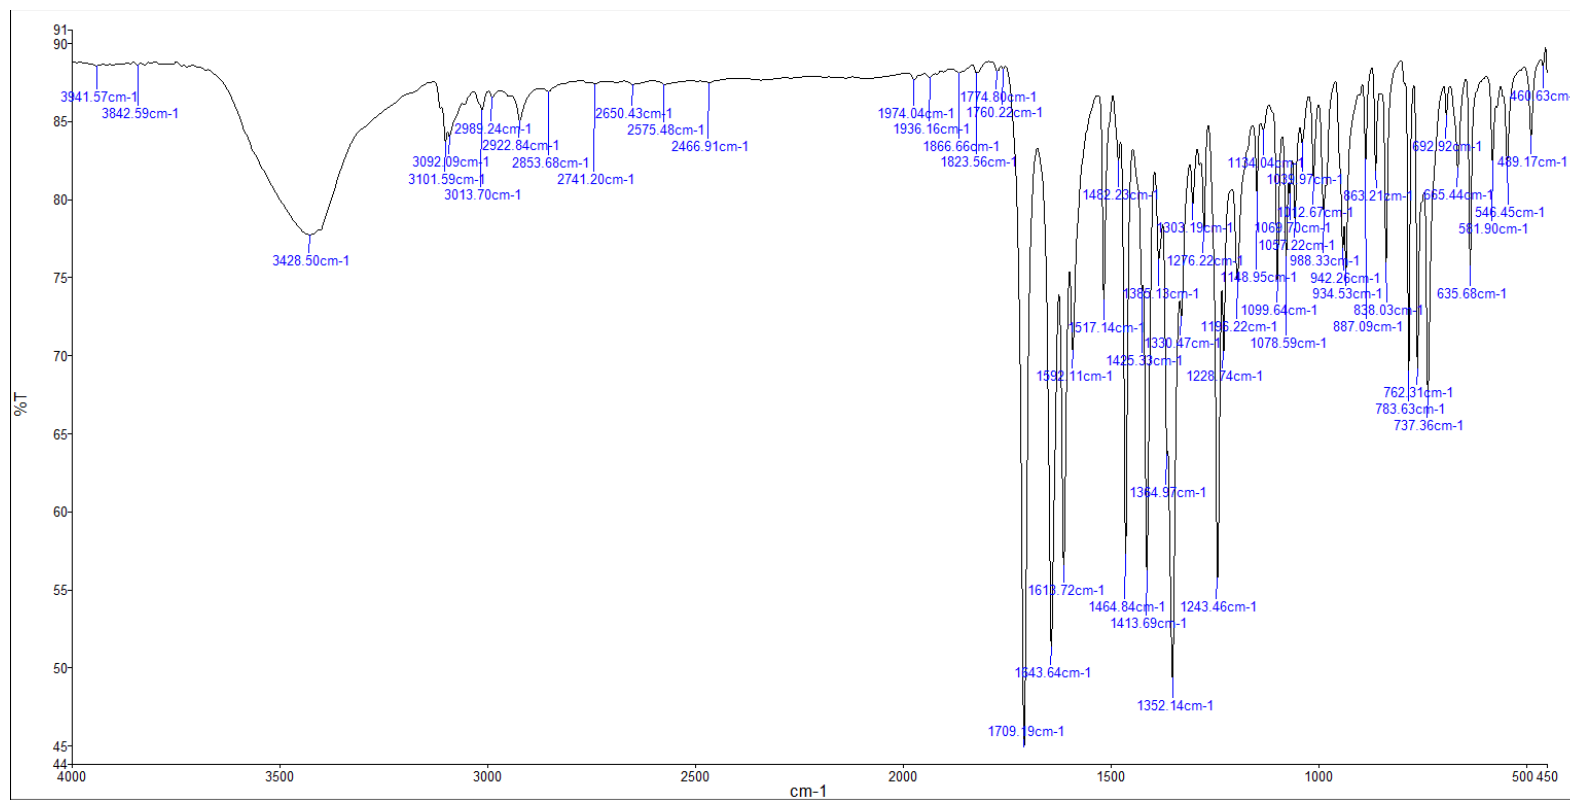

Figure S34. IR spectrum of 4h
